# Supplementary material for: Energy-, time-, and labor-saving synthesis of α-ketiminophosphonates: machine-learning-assisted simultaneous multiparameter screening for electrochemical oxidation
Source: Royal Society of Chemistry journal article supplement (doi:10.1039/d1gc01583d), 2021-01-01
Supplement: d1gc01583d1.pdf [file d1gc01583d1.pdf]

## Supporting Information

### Energy-, time-, and labor-saving synthesis of $\alpha$ -ketiminophosphonates: Machine-learning-assisted simultaneous multiparameter screening for electrochemical oxidation

Masaru Kondo<sup>1,4</sup>, Akimasa Sugizaki<sup>1</sup>, Md. Imrul Khalid<sup>1</sup>, H. D. P. Wathsala<sup>1</sup>, Kazunori Ishikawa<sup>2</sup>, Satoshi Hara<sup>2</sup>, Takayuki Takaai<sup>2</sup>, Takashi Washio<sup>2,3\*</sup>, Shinobu Takizawa<sup>1,3\*</sup>, and Hiroaki Sasai<sup>1,3\*</sup>

<sup>1</sup>*Department of Synthetic Organic Chemistry, The institute of Scientific and Industrial Research (ISIR), Osaka University, Mihogaoka, Ibaraki-shi, Osaka, 567-0047 (Japan)*

<sup>2</sup>*Department of Reasoning for Intelligence, ISIR, Osaka University*

<sup>3</sup>*Artificial Intelligence Research Center, ISIR, Osaka University*

<sup>4</sup>*Department of Materials Science and Engineering, Graduate School of Science and Engineering, Ibaraki University, Hitachi 316-8511, Ibaraki (Japan)*

Correspondence: [washio@ar.sanken.osaka-u.ac.jp](mailto:washio@ar.sanken.osaka-u.ac.jp), [taki@sanken.osaka-u.ac.jp](mailto:taki@sanken.osaka-u.ac.jp), [sasai@sanken.osaka-u.ac.jp](mailto:sasai@sanken.osaka-u.ac.jp)

#### CONTENTS:

|                                                                                                                                     |       |
|-------------------------------------------------------------------------------------------------------------------------------------|-------|
| <b>General methods</b> .....                                                                                                        | SI-2  |
| <b>General for electrochemical reactions</b> .....                                                                                  | SI-3  |
| <b>General procedure for the electrochemical synthesis of cyclic sulfonyl ketimine 2</b> .....                                      | SI-4  |
| <b>Screening of electrolytes, solvents, and electrodes</b> .....                                                                    | SI-4  |
| <b>BO-assisted multiple parameter screening for suitable reaction conditions of electrochemical oxidation using 1a and 1o</b> ..... | SI-5  |
| <b>Screening of organocatalysts for enantioselective reactions of 2k</b> .....                                                      | SI-9  |
| <b>Analytical data</b> .....                                                                                                        | SI-10 |
| <b>The procedures for the electrochemical synthesis of cyclic sulfonyl ketamine 2o with one gram of 1o</b> .....                    | SI-16 |
| <b>Cyclic voltammetry analysis of 1n, 1o, and 2n</b> .....                                                                          | SI-17 |
| <b>References</b> .....                                                                                                             | SI-20 |
| <b><sup>1</sup>H-, <sup>13</sup>C-, <sup>31</sup>P-NMR charts</b> .....                                                             | SI-21 |
| <b>HPLC charts</b> .....                                                                                                            | SI-46 |

## General methods

$^1\text{H}$ -,  $^{13}\text{C}$ -NMR, and  $^{31}\text{P}$ -NMR spectra were recorded with a JEOL JMN ECS400 FT NMR, JNM ECA600 FT NMR ( $^1\text{H}$ -NMR 400 MHz,  $^{13}\text{C}$ -NMR 100, 150 MHz, or  $^{31}\text{P}$ -NMR 240 MHz).  $^1\text{H}$ -NMR spectra are reported as follows: chemical shift in ppm relative to the chemical shift of  $\text{CHCl}_3$  at 7.26 ppm, integration, multiplicities (s = singlet, d = doublet, t = triplet, m = multiplet), and coupling constants (Hz).  $^{13}\text{C}$ -NMR spectra reported in ppm relative to the central line of triplet for  $\text{CDCl}_3$  at 77.16 ppm. ESI-MS spectra were obtained with JMS-T100LC (JEOL). Optical rotations were measured with JASCO P-1030 polarimeter. HPLC analyses were performed on a JASCO HPLC system (JASCO PU 980 pump and UV-975 UV/Vis detector). FT-IR spectra were recorded on a JASCO FT-IR system (FT/IR4100). Column chromatography on  $\text{SiO}_2$  was performed with Kanto Silica Gel 60 (40-100  $\mu\text{m}$ ). Cyclic voltammetry was carried out on a BAS CV-620E voltammetric analyzer using a platinum disk as the working electrode, platinum wire as the counter electrode, and  $\text{Ag}/\text{AgNO}_3$  as the reference electrode at a scan rate of 100  $\text{mV s}^{-1}$ . Commercially available organic and inorganic compounds were used without further purification. Cyclic sulfonamides **1** were prepared according to the known literature procedure.<sup>1</sup> GPyOpt (a programming library in Python for Bayesian Optimization) was used to suggest the next parameters to examine from the previously collected dataset. Jupyter Notebook was also used to analyze data.

### General for electrochemical reactions

The electro-oxidation was carried out using Pt plate electrodes ( $1.3 \times 1.5 \text{ cm}^2$ ) connected to Pt wire (Figure S1 (a)). The electrochemical reactions were performed in a 12 mL reaction vessel equipped with two Pt electrodes. The two electrodes are connected to DC power supply (KIKUSUI PMX 35-1A) (Figure S1 (b)). The electrochemical reactions were carried out under air (1 atm.), and at constant current.

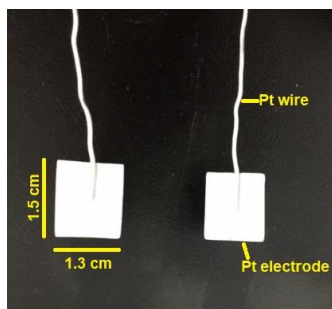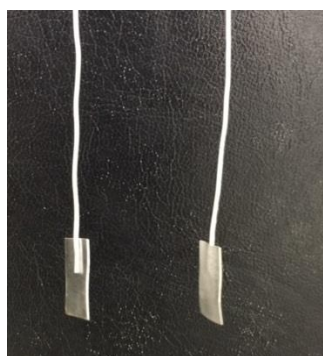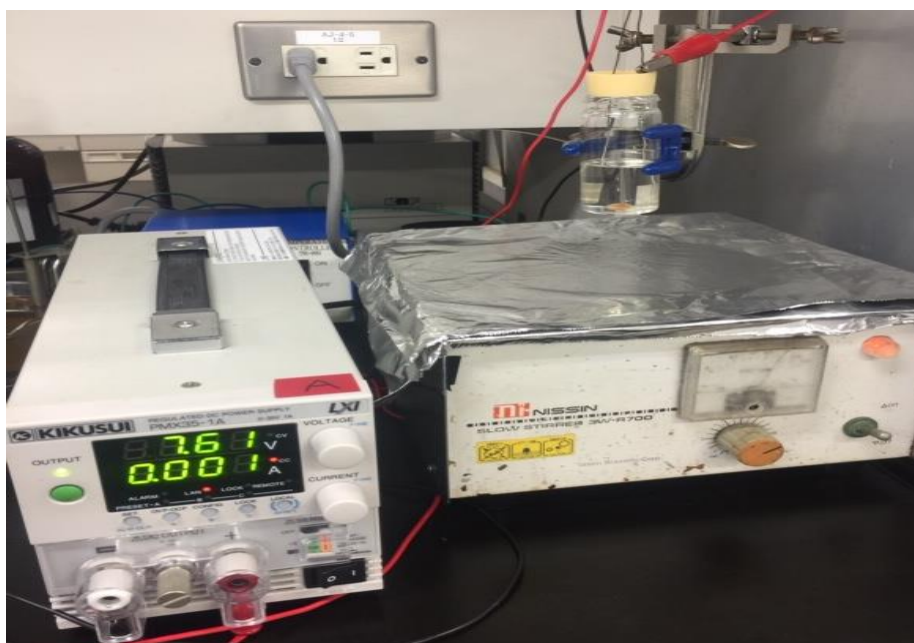

**Figure S1 (a):** Pt electrodes

**Figure S1 (b):** DC power supply (KIKUSUI PMX 35.0-1.0A)

### General procedure for the electrochemical synthesis of cyclic sulfonyl ketimines **2**

In a reaction vessel (12 mL) equipped with a stirring bar, a mixture of substrates **1** (0.0624 mmol),  $\text{LiClO}_4$  (1.14 mmol), and MeCN (6.0 mL) were added. The cell was equipped with platinum plates as the cathode and anode and performed in a KIKUSUI PMX 35-1A. The reaction mixture was stirred and electrolyzed at a constant current of 3 mA at 45 °C for 2 h. Upon completion, the solvent was removed under reduced pressure to afford the crude product, which was dissolved in AcOEt and washed with distilled water, and dried over  $\text{Na}_2\text{SO}_4$ . After removal solvent under reduced pressure, the residue was further purified by silica gel chromatography (Hexane/Acetone = 4/1 to 2/1) to afford the desired products **2**.

**Table S1.** Screening of electrolytes, solvents, and electrodes<sup>a</sup>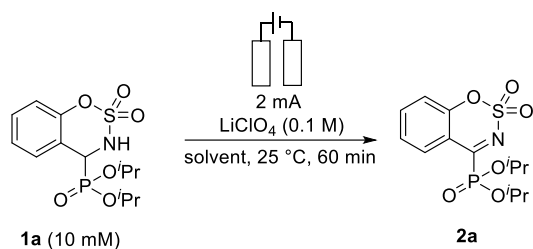

| entry | electrodes  | electrolyte                       | solvent            | conversion (%) <sup>b</sup> | NMR yield (%) <sup>b</sup> |
|-------|-------------|-----------------------------------|--------------------|-----------------------------|----------------------------|
| 1     | Pt(+)/Pt(-) | LiClO <sub>4</sub>                | CH <sub>3</sub> CN | 40                          | 22                         |
| 2     | Pt(+)/Pt(-) | Et <sub>4</sub> NClO <sub>4</sub> | CH <sub>3</sub> CN | 78                          | 6                          |
| 3     | Pt(+)/Pt(-) | Bu <sub>4</sub> NClO <sub>4</sub> | CH <sub>3</sub> CN | 40                          | 9                          |
| 4     | Pt(+)/Pt(-) | Bu <sub>4</sub> NBF <sub>4</sub>  | CH <sub>3</sub> CN | 50                          | 5                          |
| 5     | Pt(+)/Pt(-) | Bu <sub>4</sub> NPF <sub>6</sub>  | CH <sub>3</sub> CN | 47                          | 4                          |
| 6     | Pt(+)/Pt(-) | LiClO <sub>4</sub>                | CH <sub>3</sub> OH | 0                           | 0                          |
| 7     | Pt(+)/Pt(-) | LiClO <sub>4</sub>                | DMF                | 20                          | 0                          |
| 8     | Pt(+)/Pt(-) | LiClO <sub>4</sub>                | THF                | 5                           | 0                          |
| 9     | Pt(+)/Pt(-) | LiClO <sub>4</sub>                | Acetone            | 35                          | 14                         |
| 10    | C(+)/Pt(-)  | LiClO <sub>4</sub>                | CH <sub>3</sub> CN | 10                          | 0                          |
| 11    | C(+)/C(-)   | LiClO <sub>4</sub>                | CH <sub>3</sub> CN | 0                           | 0                          |

<sup>a</sup>Reaction conditions: undivided cell, **1a** (10 mM), LiClO<sub>4</sub> (0.1 M), constant current = 2 mA, under air. <sup>b</sup>1,3,5-Trimethoxybenzene was used as an internal standard.

**Table S2.** Table 1 in the manuscript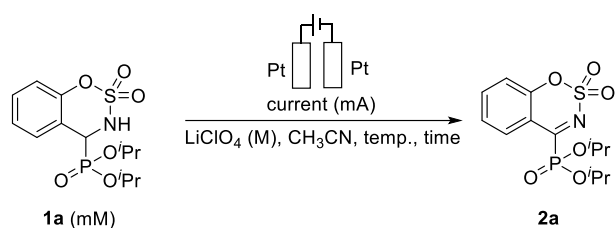

| entry     | current (mA) | <b>1a</b> (mM) | LiClO <sub>4</sub> (M) | Temp. (°C) | Time (min) | NMR yield (%) <sup>b</sup> |
|-----------|--------------|----------------|------------------------|------------|------------|----------------------------|
| 1         | 1            | 10             | 0.05                   | 60         | 180        | 8.4 (≈ 8)                  |
| 2         | 2            | 20             | 0.2                    | 25         | 60         | 16                         |
| 3         | 3            | 10             | 0.1                    | 40         | 120        | 65                         |
| 4         | 4            | 15             | 0.1                    | 40         | 60         | 38                         |
| 5         | 5            | 5              | 0.05                   | 25         | 120        | 26                         |
| 6         | 4            | 11             | 0.22                   | 50         | 130        | 60                         |
| 7         | 3            | 11             | 0.13                   | 45         | 120        | 66                         |
| 8         | 1            | 18             | 0.05                   | 45         | 120        | 3                          |
| 9         | 3            | 9.7            | 0.12                   | 45         | 120        | 65                         |
| 10        | 5            | 10             | 0.21                   | 45         | 120        | 41                         |
| 11        | 2            | 10             | 0.06                   | 45         | 120        | 50                         |
| <b>12</b> | <b>3</b>     | <b>10.4</b>    | <b>0.19</b>            | <b>45</b>  | <b>120</b> | <b>72 (71)<sup>c</sup></b> |
| 13        | 3            | 10.4           | 0.25                   | 45         | 120        | 64                         |
| 14        | 3            | 10.5           | 0.05                   | 45         | 120        | 60                         |

<sup>a</sup>Reaction conditions: undivided cell, Pt anode, Pt cathode, **1a**, LiClO<sub>4</sub>, CH<sub>3</sub>CN (6 mL), under air.  
<sup>b</sup>1,3,5-Trimethoxybenzene was used as an internal standard. <sup>c</sup>Isolated yield. <sup>d</sup>During the BO using all parameters and yields in entries 1 to 12, the outcome in entry 12 shows a trend of saturation close to highest yield. Additional investigations in entries 13 and 14 support the saturation.

## Bayesian Optimization using GPyOpt for Table S2

```
import numpy as np
import GPy
import GPyOpt
import warnings
warnings.filterwarnings('ignore')

X = np.array([[ 1, 10, 0.05, 60, 180],
              [ 2, 20, 0.2, 25, 60],
              [ 3, 10, 0.1, 40, 120],
              [ 4, 15, 0.1, 40, 60],
              [ 5, 5, 0.05, 25, 120],
              [ 4, 11, 0.22, 50, 130],
              [ 3, 11, 0.13, 45, 120],
              [ 1, 18, 0.05, 45, 120],
              [3, 9.7, 0.12, 45, 120],
              [ 5, 10, 0.21, 45, 120],
              [2, 10, 0.06, 45, 120],
              [3, 10.4, 0.19, 45, 120],
              [3, 10.4, 0.25, 45, 120],
              [3, 10.5, 0.05, 45, 120]])

Y = -np.array([8.4, 16, 65, 38, 26, 60, 66, 3, 65, 41, 50, 72, 64, 60])[:, np.newaxis]

initial_x = X
initial_y = Y

bounds = [{'name': 'current', 'type': 'continuous', 'domain': (1,6)},
          {'name': 'int_molarity', 'type': 'continuous', 'domain': (5,30)},
          {'name': 'electrolyte', 'type': 'continuous', 'domain': (0.05,0.25)},
          {'name': 'temp', 'type': 'continuous', 'domain': (20,80)},
          {'name': 'time', 'type': 'continuous', 'domain': (60,240)}]

myBopt = GPyOpt.methods.BayesianOptimization(f=None,
                                             domain=bounds,
                                             X = initial_x,
                                             Y = initial_y,
                                             acquisition_type='EI',
                                             )

next_x = myBopt.suggest_next_locations()
print(next_x)
```

**Table S3.** Table 2 in the manuscript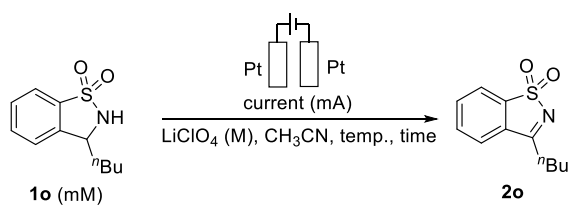

| entry    | current (mA) | <b>1o</b> (mM) | $\text{LiClO}_4$ (M) | Temp. ( $^{\circ}\text{C}$ ) | Time (min) | NMR yield (%) <sup>b</sup> |
|----------|--------------|----------------|----------------------|------------------------------|------------|----------------------------|
| 1        | 1            | 10             | 0.05                 | 60                           | 180        | 46                         |
| 2        | 2            | 20             | 0.2                  | 25                           | 60         | 22                         |
| 3        | 3            | 10             | 0.1                  | 40                           | 120        | 62                         |
| 4        | 4            | 15             | 0.1                  | 40                           | 60         | 53                         |
| 5        | 5            | 5              | 0.05                 | 25                           | 120        | 14                         |
| 6        | 4            | 10             | 0.12                 | 60                           | 180        | 29                         |
| <b>7</b> | <b>3</b>     | <b>11.7</b>    | <b>0.22</b>          | <b>40</b>                    | <b>120</b> | <b>67 (66)<sup>c</sup></b> |
| 8        | 3            | 13             | 0.25                 | 40                           | 120        | 67                         |
| 9        | 2            | 12.6           | 0.25                 | 40                           | 120        | 52                         |

<sup>a</sup>Reaction conditions: undivided cell, Pt anode, Pt cathode, **1o**,  $\text{LiClO}_4$ ,  $\text{CH}_3\text{CN}$  (6 mL), under air. <sup>b</sup>1,3,5-Trimethoxybenzene was used as an internal standard. <sup>c</sup>Isolated yield. <sup>d</sup>During the BO using all parameters and yields in entries 1 to 7, the outcome in entry 7 shows a trend of saturation close to highest yield. Additional investigations in entries 8 and 9 support the saturation.

## Bayesian Optimization using GPyOpt for Table S3

```
import numpy as np
import GPy
import GPyOpt
import warnings
warnings.filterwarnings('ignore')

X = np.array([[ 1, 10, 0.05, 60, 180],
              [ 2, 20, 0.2, 25, 60],
              [ 3, 10, 0.1, 40, 120],
              [ 4, 15, 0.1, 40, 60],
              [ 5, 5, 0.05, 25, 120],
              [ 4, 10, 0.12, 60, 180],
              [ 3, 11.7, 0.22, 40, 120],
              [ 3, 13, 0.25, 40, 120],
              [ 2, 12.6, 0.25, 40, 120]])

Y = -np.array([46, 22, 62, 53, 14, 29, 67, 67, 52])[ :, np.newaxis]

initial_x = X
initial_y = Y

bounds = [{'name': 'current', 'type': 'continuous', 'domain': (1, 6)},
          {'name': 'Init_molarity', 'type': 'continuous', 'domain': (5, 30)},
          {'name': 'electrolyte', 'type': 'continuous', 'domain': (0.05, 0.25)},
          {'name': 'temp', 'type': 'continuous', 'domain': (20, 80)},
          {'name': 'time', 'type': 'continuous', 'domain': (60, 240)}]

myBopt = GPyOpt.methods.BayesianOptimization(f=None,
                                             domain=bounds,
                                             X = initial_x,
                                             Y = initial_y,
                                             acquisition_type='EI',
                                             )

next_x = myBopt.suggest_next_locations()
print(next_x)
```



**Table S4.** Screening of organocatalysts for enantioselective reactions of **2k**

For aza-MBH reaction

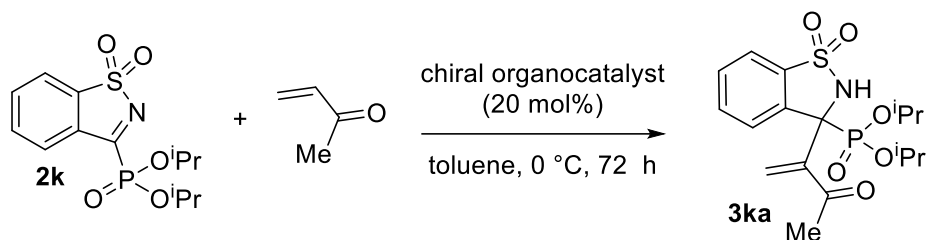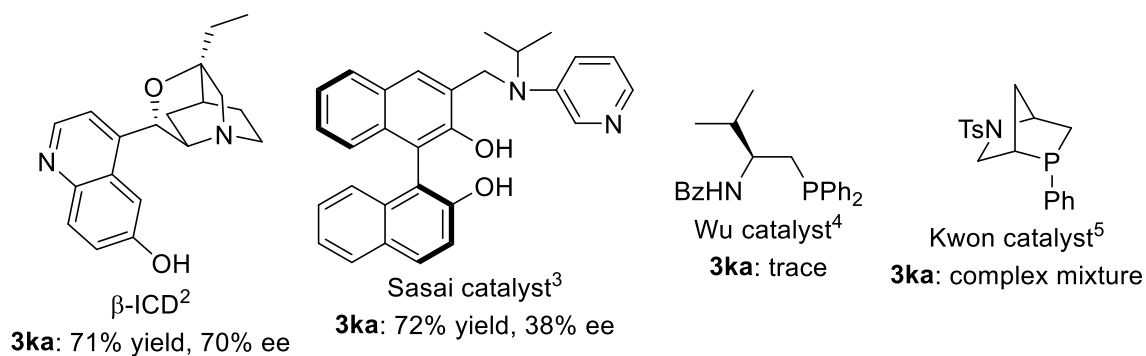

For aza-Henry reaction

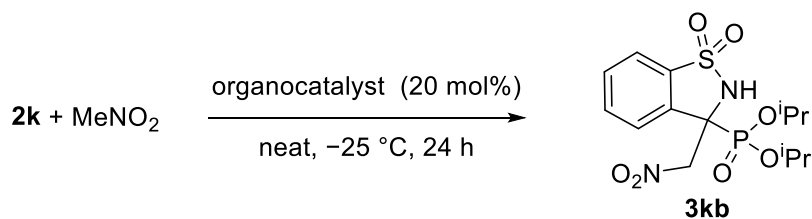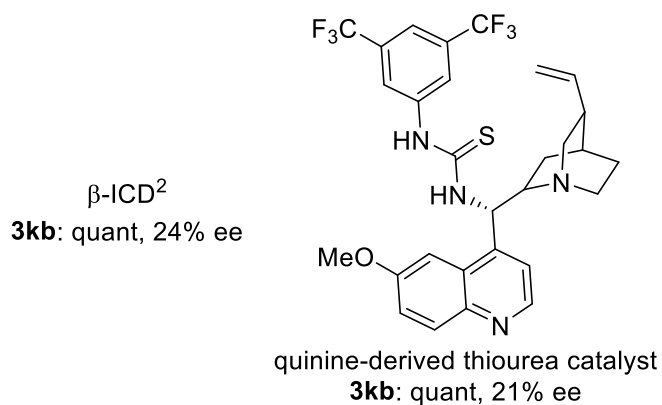

### 1,2,3-Benzoxathiazine-2,2-dioxide-4-diisopropylphosphonate (2a)

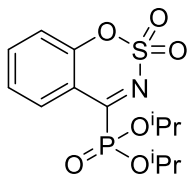

**2a:** 71% yield

<sup>1</sup>H and <sup>13</sup>C NMR charts were consistent with previously reported data.<sup>1a</sup>

<sup>1</sup>H-NMR (400 MHz, CDCl<sub>3</sub>) δ 8.51 (d, *J* = 7.8 Hz, 1H), 7.76-7.72 (m, 1H), 7.44-7.41 (m, 1H), 7.30 (d, *J* = 8.2 Hz, 1H), 4.96-4.88 (m, 2H), 1.43 (d, *J* = 6.2 Hz, 6H), 1.40 (d, *J* = 6.2 Hz, 6H); <sup>13</sup>C-NMR (100 MHz, CDCl<sub>3</sub>) δ 173.6 (d, *J*<sub>C-P</sub> = 199.4 Hz), 154.4 (d, *J*<sub>C-P</sub> = 8.6 Hz), 137.7, 131.5, 126.3, 119.1, 115.9 (d, *J*<sub>C-P</sub> = 24.9 Hz), 75.2 (d, *J*<sub>C-P</sub> = 6.7 Hz), 24.1 (d, *J*<sub>C-P</sub> = 3.8 Hz), 23.9 (d, *J*<sub>C-P</sub> = 4.8 Hz)

### 1,2,3-Benzoxathiazine-2,2-dioxide-5-methyl-4-diisopropylphosphonate (2b)

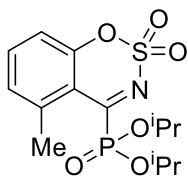

**2b:** 85% yield

<sup>1</sup>H-NMR (400 MHz, CDCl<sub>3</sub>) δ 8.34 (d, *J* = 7.6 Hz, 1H), 7.58 (d, *J* = 7.6 Hz, 1H), 7.31 (t, *J* = 7.6 Hz, 1H), 4.94-4.89 (m, 2H), 2.40 (s, 3H), 1.42 (d, *J* = 6.2 Hz, 6H), 1.40 (d, *J* = 6.2 Hz, 6H); <sup>13</sup>C-NMR (100 MHz, CDCl<sub>3</sub>) δ 173.8 (d, *J*<sub>C-P</sub> = 199.4 Hz), 152.6 (d, *J*<sub>C-P</sub> = 9.6 Hz), 139.2, 128.8 (d, *J*<sub>C-P</sub> = 2.9 Hz), 125.6, 115.6 (d, *J*<sub>C-P</sub> = 24.0 Hz), 75.0 (d, *J*<sub>C-P</sub> = 7.7 Hz), 24.1 (d, *J*<sub>C-P</sub> = 3.8 Hz), 23.8 (d, *J*<sub>C-P</sub> = 4.8 Hz), 15.0; <sup>31</sup>P NMR (240 MHz, CDCl<sub>3</sub>) δ 0.2; HRMS (ESI) calcd for 384.0641: *m/z* ([M+Na<sup>+</sup>]), found 384.0641; IR (KBr) 2988, 1544, 1403, 1253, 1101, 1005 cm<sup>-1</sup>.

### 1,2,3-Benzoxathiazine-2,2-dioxide-6-methyl-4-diisopropylphosphonate (2c)

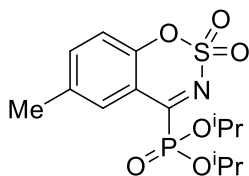

**2c:** 95% yield

<sup>1</sup>H and <sup>13</sup>C NMR charts were consistent with previously reported data.<sup>6</sup>

<sup>1</sup>H-NMR (400 MHz, CDCl<sub>3</sub>) δ 8.3-8.27 (m, 1H), 7.54-7.52 (m, 1H), 7.20-7.17 (m, 1H), 4.95-4.87 (m, 2H), 2.44 (s, 3H), 1.43 (d, *J* = 6.2 Hz, 6H), 1.40 (d, *J* = 6.2 Hz, 6H); <sup>13</sup>C-NMR (100 MHz, CDCl<sub>3</sub>) δ 173.6 (d, *J*<sub>C-P</sub> = 199.4 Hz), 152.4 (d, *J*<sub>C-P</sub> = 8.6 Hz), 138.6, 136.5, 131.2, 115.7 (d, *J*<sub>C-P</sub> = 24.0 Hz), 118.8, 75.1 (d, *J*<sub>C-P</sub> = 6.7 Hz), 24.1 (d, *J*<sub>C-P</sub> = 3.8 Hz), 23.9 (d, *J*<sub>C-P</sub> = 5.8 Hz), 21.1

### 1,2,3-Benzoxathiazine-2,2-dioxide-7-methyl-4-diisopropylphosphonate (2d)

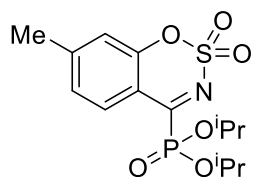

**2d:** 72% yield

$^1\text{H}$  and  $^{13}\text{C}$  NMR charts were consistent with previously reported data.<sup>1a</sup>

$^1\text{H}$ -NMR (400 MHz,  $\text{CDCl}_3$ )  $\delta$  8.38 (d,  $J = 8.2$  Hz, 1H), 7.21 (d,  $J = 8.2$  Hz, 1H), 7.09 (s, 1H), 4.94-4.86 (m, 2H), 2.49 (s, 3H), 1.42 (d,  $J = 6.2$  Hz, 6H), 1.39 (d,  $J = 6.2$  Hz, 6H);  $^{13}\text{C}$ -NMR (100 MHz,  $\text{CDCl}_3$ )  $\delta$  173.2 (d,  $J_{\text{C-P}} = 200.3$  Hz), 154.5 (d,  $J_{\text{C-P}} = 9.6$  Hz), 150.6, 131.2, 127.3, 119.3 (d,  $J_{\text{C-P}} = 3.8$  Hz), 113.6 (d,  $J_{\text{C-P}} = 24.9$  Hz), 75.0 (d,  $J_{\text{C-P}} = 7.7$  Hz), 24.1 (d,  $J_{\text{C-P}} = 3.8$  Hz), 23.9 (d,  $J_{\text{C-P}} = 4.8$  Hz), 22.4

### 1,2,3-Benzoxathiazine-2,2-dioxide-8-methyl-4-diisopropylphosphonate (2e)

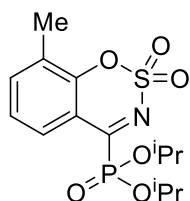

**2e:** 92% yield

$^1\text{H}$ -NMR (400 MHz,  $\text{CDCl}_3$ )  $\delta$  8.34 (d,  $J = 7.8$  Hz, 1H), 7.58 (d,  $J = 8.0$  Hz, 1H), 7.33-7.29 (m, 1H), 4.95-4.87 (m, 2H), 2.40 (s, 3H), 1.42 (d,  $J = 6.2$  Hz, 6H), 1.39 (d,  $J = 6.2$  Hz, 6H);  $^{13}\text{C}$ -NMR (100 MHz,  $\text{CDCl}_3$ )  $\delta$  173.9 (d,  $J_{\text{C-P}} = 200.3$  Hz), 152.7 (d,  $J_{\text{C-P}} = 8.6$  Hz), 139.3, 128.9 (d,  $J_{\text{C-P}} = 14.4$  Hz), 125.6, 115.7 (d,  $J_{\text{C-P}} = 24.9$  Hz), 75.0 (d,  $J_{\text{C-P}} = 6.7$  Hz), 24.1 (d,  $J_{\text{C-P}} = 2.9$  Hz), 23.9 (d,  $J_{\text{C-P}} = 5.8$  Hz), 15.0;  $^{31}\text{P}$  NMR (240 MHz,  $\text{CDCl}_3$ )  $\delta$  0.2; HRMS (ESI) calcd for  $m/z$  384.0641: ( $[\text{M}+\text{Na}^+]$ ), found  $m/z$  384.0640; IR (KBr) 2985, 1545, 1403, 1253, 1178, 1006  $\text{cm}^{-1}$ .

### 1,2,3-Benzoxathiazine-2,2-dioxide-6-methoxy-4-diisopropylphosphonate (2f)

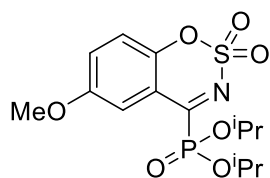

**2f:** 75% yield

$^1\text{H}$  and  $^{13}\text{C}$  NMR charts were consistent with previously reported data.<sup>1a</sup>

$^1\text{H}$ -NMR (400 MHz,  $\text{CDCl}_3$ )  $\delta$  8.02-8.01 (m, 1H), 7.29-7.26 (m, 1H), 7.23-7.21 (m, 1H), 4.94-4.89 (m, 2H), 3.87 (s, 3H), 1.44 (d,  $J = 6.2$  Hz, 6H), 1.41 (d,  $J = 6.2$  Hz, 6H);  $^{13}\text{C}$ -NMR (100 MHz,  $\text{CDCl}_3$ )  $\delta$  173.3 (d,  $J_{\text{C-P}} = 200.3$  Hz), 157.06, 148.3 (d,  $J_{\text{C-P}} = 7.7$  Hz), 125.3, 120.1, 116.2 (d,  $J_{\text{C-P}} = 24.0$  Hz), 113.3, 75.1 (d,  $J_{\text{C-P}} = 7.7$  Hz), 56.2, 24.1 (d,  $J_{\text{C-P}} = 2.9$  Hz), 23.9 (d,  $J_{\text{C-P}} = 5.8$  Hz)

### 1,2,3-Benzoxathiazine-2,2-dioxide-6-bromo-4-diisopropylphosphonate (2g)

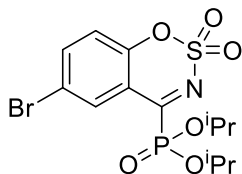

**2g:** 75% yield

$^1\text{H}$  and  $^{13}\text{C}$  NMR charts were consistent with previously reported data.<sup>7</sup>

$^1\text{H}$ -NMR (400 MHz,  $\text{CDCl}_3$ )  $\delta$  8.65-8.61 (m, 1H), 7.85-7.82 (m, 1H), 7.21-7.19 (m, 1H), 4.97-4.90 (m, 2H), 1.44 (d,  $J = 6.2$  Hz, 6H), 1.42 (d,  $J = 6.2$  Hz, 6H);  $^{13}\text{C}$ -NMR (100 MHz,  $\text{CDCl}_3$ )  $\delta$  172.6 (d,  $J_{\text{C-P}} = 200.3$  Hz), 153.2 (d,  $J_{\text{C-P}} = 8.6$  Hz), 140.4, 133.7, 120.8, 119.1, 117.0 (d,  $J_{\text{C-P}} = 24.0$  Hz), 75.5 (d,  $J_{\text{C-P}} = 7.7$  Hz), 24.2 (d,  $J_{\text{C-P}} = 3.8$  Hz), 23.9 (d,  $J_{\text{C-P}} = 4.8$  Hz)

### 1,2,3-Benzoxathiazine-2,2-dioxide-6-*tert*-butyl-4-diisopropylphosphonate (2h)

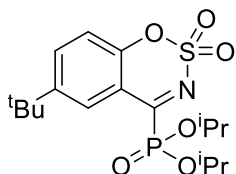

**2h:** 98% yield

$^1\text{H}$ -NMR (400 MHz,  $\text{CDCl}_3$ )  $\delta$  8.52-8.49 (m, 1H), 7.77-7.75 (m, 1H), 7.22 (d,  $J = 8.7$  Hz, 1H), 4.96-4.88 (m, 2H), 1.43 (d,  $J = 6.4$  Hz, 6H), 1.41 (d,  $J = 6.4$  Hz, 6H), 1.36 (s, 9H);  $^{13}\text{C}$ -NMR (100 MHz,  $\text{CDCl}_3$ )  $\delta$  173.7 (d,  $J_{\text{C-P}} = 200.3$  Hz), 152.2 (d,  $J_{\text{C-P}} = 8.6$  Hz), 149.7, 135.3, 128.1, 118.2, 115.4 (d,  $J_{\text{C-P}} = 24.0$  Hz), 74.9 (d,  $J_{\text{C-P}} = 6.7$  Hz), 35.1, 31.2, 24.2 (d,  $J_{\text{C-P}} = 3.8$  Hz), 23.9 (d,  $J_{\text{C-P}} = 5.8$  Hz);  $^{31}\text{P}$  NMR (240 MHz,  $\text{CDCl}_3$ )  $\delta$  0.6; HRMS (ESI) calcd for  $m/z$  426.1111: ( $[\text{M}+\text{Na}^+]$ ), found  $m/z$  426.1110; IR (KBr) 2970, 1547, 1401, 1254, 1192, 1002  $\text{cm}^{-1}$ .

### 1,2,3-Benzoxathiazine-2,2-dioxide-6-phenyl-4-diisopropylphosphonate (2i)

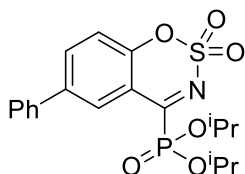

**2i:** 73% yield

$^1\text{H}$ -NMR (400 MHz,  $\text{CDCl}_3$ )  $\delta$  8.75-8.73 (m, 1H), 7.96-7.93 (m, 1H), 7.58 (d,  $J = 7.3$  Hz, 2H), 7.51-7.46 (m, 2H), 7.43 (d,  $J = 6.9$  Hz, 1H), 7.37 (d,  $J = 8.2$  Hz, 1H), 4.96-4.92 (m, 2H), 1.44 (d,  $J = 6.2$  Hz, 6H), 1.42 (d,  $J = 6.2$  Hz, 6H);  $^{13}\text{C}$ -NMR (100 MHz,  $\text{CDCl}_3$ )  $\delta$  173.6 (d,  $J_{\text{C-P}} = 199.4$  Hz), 153.5 (d,  $J_{\text{C-P}} = 8.6$  Hz), 139.8, 138.3, 136.2, 129.6, 129.4, 128.6, 127.2, 119.4, 116.0 (d,  $J_{\text{C-P}} = 24.0$  Hz), 75.2 (d,  $J_{\text{C-P}} = 7.7$  Hz), 29.8, 24.2 (d,  $J_{\text{C-P}} = 2.9$  Hz), 23.9 (d,  $J_{\text{C-P}} = 5.8$  Hz);  $^{31}\text{P}$  NMR (240 MHz,  $\text{CDCl}_3$ )  $\delta$  0.0; HRMS (ESI) calcd for  $m/z$  446.0798: ( $[\text{M}+\text{Na}^+]$ ), found  $m/z$  446.0797; IR (KBr) 2925, 1544, 1401, 1261, 1191, 1006  $\text{cm}^{-1}$ .

### 1,2,3-Benzoxathiazine-2,2-dioxide-7-methyl-4-diethylphosphonate (2j)

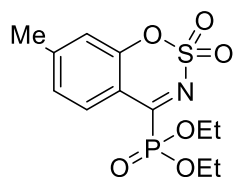

**2j:** 79% yield

$^1\text{H-NMR}$  (400 MHz,  $\text{CDCl}_3$ )  $\delta$  8.36 (d,  $J = 8.2$  Hz, 1H), 7.22 (d,  $J = 8.2$  Hz, 1H), 7.11 (s, 1H), 4.39-4.31 (m, 4H), 2.49 (s, 3H), 1.41 (t,  $J = 7.1$  Hz, 6H);  $^{13}\text{C-NMR}$  (100 MHz,  $\text{CDCl}_3$ )  $\delta$  172.5 (d,  $J_{\text{C-P}} = 198.4$  Hz), 154.5 (d,  $J_{\text{C-P}} = 9.6$  Hz), 150.8, 131.1, 127.5, 119.3 (d,  $J_{\text{C-P}} = 3.8$  Hz), 113.6 (d,  $J_{\text{C-P}} = 24.9$  Hz), 65.5 (d,  $J_{\text{C-P}} = 6.7$  Hz), 22.5, 16.4 (d,  $J_{\text{C-P}} = 5.8$  Hz);  $^{31}\text{P NMR}$  (240 MHz,  $\text{CDCl}_3$ )  $\delta$  1.7; HRMS (ESI) calcd for  $m/z$  356.0328: ( $[\text{M}+\text{Na}^+]$ ), found  $m/z$  356.0322; IR (KBr) 2965, 1623, 1527, 1397, 1260, 1198, 1021  $\text{cm}^{-1}$ .

### Diisopropyl-(1,1-dioxidobenzo[d]isothiazol-3-yl)phosphonate (2k)

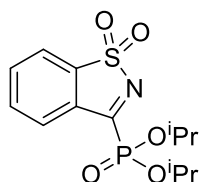

**2k:** 71% yield

$^1\text{H}$  and  $^{13}\text{C}$  NMR charts were consistent with previously reported data.<sup>1a</sup>

$^1\text{H-NMR}$  (400 MHz,  $\text{CDCl}_3$ )  $\delta$  8.22-8.19 (m, 1H), 7.94-7.92 (m, 1H), 7.77-7.75 (m, 2H), 4.98-4.93 (m, 2H), 1.44-1.41 (m, 12H);  $^{13}\text{C-NMR}$  (100 MHz,  $\text{CDCl}_3$ )  $\delta$  168.3 (d,  $J_{\text{C-P}} = 205.1$  Hz), 138.7, 134.3 (d,  $J_{\text{C-P}} = 40.0$  Hz), 130.2 (d,  $J_{\text{C-P}} = 25.9$  Hz), 127.8, 123.0, 75.1 (d,  $J_{\text{C-P}} = 6.7$  Hz), 24.1 (d,  $J_{\text{C-P}} = 3.8$  Hz), 24.0 (d,  $J_{\text{C-P}} = 4.8$  Hz)

### Diisopropyl-(5-methyl-1,1-dioxidobenzo[d]isothiazol-3-yl)phosphonate (2l)

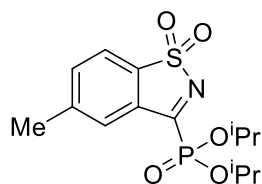

**2l:** 72% yield

$^1\text{H}$  and  $^{13}\text{C}$  NMR charts were consistent with previously reported data.<sup>1a</sup>

$^1\text{H-NMR}$  (400 MHz,  $\text{CDCl}_3$ )  $\delta$  8.00 (s, 1H), 7.79 (d,  $J = 7.8$  Hz, 1H), 7.54 (d,  $J = 7.8$  Hz, 1H), 4.97-4.92 (m, 2H), 2.52 (s, 3H), 1.43 (d,  $J = 6.2$  Hz, 6H), 1.41 (d,  $J = 6.2$  Hz, 7H);  $^{13}\text{C-NMR}$  (100 MHz,  $\text{CDCl}_3$ )  $\delta$  168.3 (d,  $J_{\text{C-P}} = 203.2$  Hz), 146.0, 136.0, 134.7, 130.7 (d,  $J_{\text{C-P}} = 24.9$  Hz), 128.1, 122.8, 75.1 (d,  $J_{\text{C-P}} = 6.7$  Hz), 24.1 (d,  $J_{\text{C-P}} = 3.8$  Hz), 23.9 (d,  $J_{\text{C-P}} = 5.8$  Hz), 21.9

### 4-Phenyl-1,2,3-benzoxathiazine-2,2-dioxide (2m)

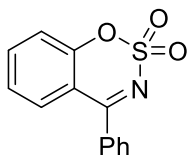

**2m:** 87% yield

<sup>1</sup>H and <sup>13</sup>C NMR charts were consistent with previously reported data.<sup>1b</sup>

<sup>1</sup>H-NMR (400 MHz, CDCl<sub>3</sub>) δ 7.72-7.84 (m, 3H), 7.62-7.72 (m, 2H), 7.52-7.62 (m, 2H), 7.33-7.47 (m, 2H); <sup>13</sup>C-NMR (100 MHz, CDCl<sub>3</sub>) δ 176.5, 154.7, 137.0, 133.8, 133.3, 131.9, 130.7, 129.0, 125.8, 119.6, 116.7

### 3-Phenyl-1,2-benzisothiazole 1,1-dioxide (2n)

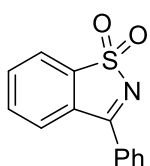

**2n:** 94% yield

<sup>1</sup>H and <sup>13</sup>C NMR charts were consistent with previously reported data.<sup>1b</sup>

<sup>1</sup>H-NMR (400 MHz, CDCl<sub>3</sub>) δ 8.03 (d, *J* = 7.5 Hz, 1H), 7.98 (d, *J* = 7.8 Hz, 2H), 7.91 (d, *J* = 7.5 Hz, 1H), 7.82-7.75 (m, 2H), 7.73-7.69 (m, 1H), 7.64-7.60 (m, 2H); <sup>13</sup>C-NMR (100 MHz, CDCl<sub>3</sub>) δ 171.2, 141.2, 133.8, 133.6, 130.7, 130.5, 129.6, 129.4, 126.7, 123.2

### 3-(*n*-Butyl)-1,2-benzisothiazole 1,1-dioxide (2o)

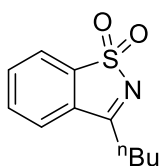

**2o:** 66% yield

<sup>1</sup>H and <sup>13</sup>C NMR charts were consistent with previously reported data.<sup>8</sup>

<sup>1</sup>H-NMR (400 MHz, CDCl<sub>3</sub>) δ 7.93-7.91 (m, 1H), 7.75-7.69 (m, 3H), 2.97 (t, *J* = 7.3 Hz, 2H), 1.90-1.86 (m, 2H), 1.54-1.49 (m, 2H), 0.99 (t, *J* = 7.6 Hz, 3H); <sup>13</sup>C-NMR (100 MHz, CDCl<sub>3</sub>) δ 176.5, 139.9, 134.0, 133.6, 131.5, 124.0, 122.6, 31.0, 27.6, 22.5, 13.9

### 4-Phenyl-5H-[1,2,3]oxathiazole 2,2-Dioxide (2p)

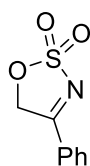

**2p:** 80% yield

$^1\text{H}$  and  $^{13}\text{C}$  NMR charts were consistent with previously reported data.<sup>9</sup>

$^1\text{H}$ -NMR (400 MHz,  $\text{CDCl}_3$ )  $\delta$  7.93-7.91 (m, 2H), 7.77-7.72 (m, 1H), 7.59 (t,  $J = 7.8$  Hz, 2H), 5.59 (s, 2H);  $^{13}\text{C}$ -NMR (100 MHz,  $\text{CDCl}_3$ )  $\delta$  175.5, 136.1, 129.8, 129.1, 127.3, 74.5

### Diisopropyl-(1,1-dioxido-3-(3-oxobut-1-en-2-yl)-2,3-dihydrobenzo[d]isothiazol-3-yl)phosphonate (3ka)

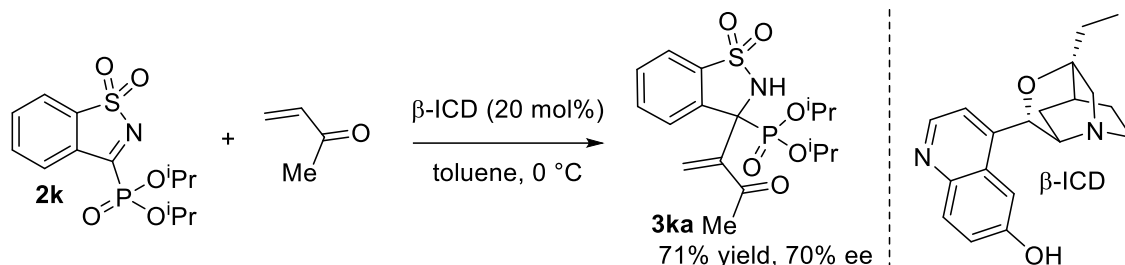

Methyl vinyl ketone (27  $\mu\text{L}$ , 0.33 mmol) was added to a mixture of diisopropyl (1,1-dioxido-3-(3-oxobut-1-en-2-yl)-2,3-dihydrobenzo[d]isothiazol-3-yl)phosphonate (**2k**) (35.1 mg, 0.11 mmol) and  $\beta$ -ICD (6.8 mg, 0.022 mol) in toluene (1 mL) at 0 °C under nitrogen atmosphere. After stirring 0 °C for 72 h, toluene (10 mL) was added to the mixture. Subsequently the diluted reaction mixture was filtrated with a pad of silica gel using acetone as an eluent, the filtrate was condensed *in vacuo*, the obtained residue was purified by PTLC (eluent: EtOAc only x 2) to give the title compound **3ka** (31.4 mg, 71% yield).

$^1\text{H}$ -NMR (400 MHz,  $\text{CDCl}_3$ )  $\delta$  7.99 (d,  $J = 7.6$  Hz, 1H), 7.85 (d,  $J = 7.6$  Hz, 1H), 7.71 (t,  $J = 7.6$  Hz, 1H), 7.63 (t,  $J = 7.6$  Hz, 1H), 7.60 (brs, 1H), 6.28-6.24 (m, 1H), 6.15-6.12 (m, 1H), 4.80-4.72 (m, 1H), 4.52-4.55 (m, 1H), 2.46 (s, 3H), 1.32 (d,  $J = 6.0$  Hz, 3H), 1.25-1.21 (m, 6H), 0.90 (d,  $J = 6.0$  Hz, 3H);  $^{13}\text{C}$ -NMR (150 MHz,  $\text{CDCl}_3$ )  $\delta$  201.3, 142.6, 135.6, 134.7, 132.7, 130.4, 130.0, 127.7, 122.1, 74.1 (d,  $J_{\text{C-P}} = 7.2$  Hz), 73.9 (d,  $J_{\text{C-P}} = 7.2$  Hz), 66.3 (d,  $J_{\text{C-P}} = 167.6$  Hz), 28.7, 24.2, 23.7 (d,  $J_{\text{C-P}} = 5.8$  Hz), 23.2 (d,  $J_{\text{C-P}} = 5.8$  Hz);  $^{31}\text{P}$  NMR (240 MHz,  $\text{CDCl}_3$ )  $\delta$  14.6; HRMS (ESI) calcd for  $m/z$  424.0954: ( $[\text{M}+\text{Na}^+]$ ), found  $m/z$  424.0953; IR (KBr) 2982, 2936, 1737, 1453, 1376, 1304, 1249, 1171, 1103, 994  $\text{cm}^{-1}$ ;  $[\alpha]_{\text{D}}^{18} = +15.4$  (c 3.9  $\text{CHCl}_3$  for 70% ee); HPLC conditions: Daicel Chiralpak IE column, *n*-hexane/*i*PrOH = 50/50, 1.0 mL/min, 224 nm,  $t_{\text{R}} = 31.9$  min (major isomer) and 44.6 min (minor isomer).

### Diisopropyl-(3-(nitromethyl)-1,1-dioxido-2,3-dihydrobenzo[d]isothiazol-3-yl)phosphonate (3kb)

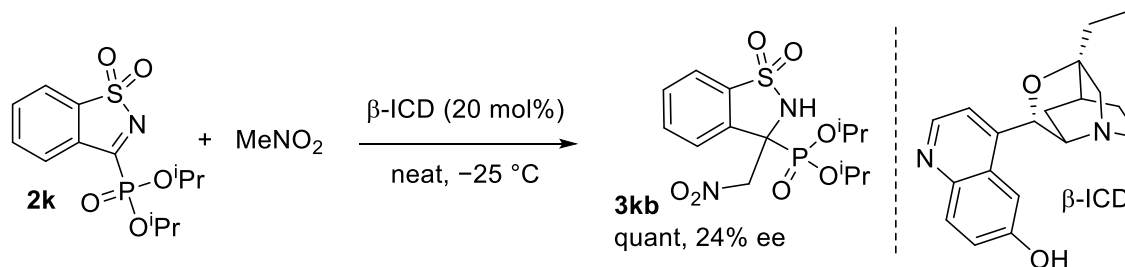

Nitromethane (0.1 mL, 1.9 mmol) was added to a mixture of diisopropyl

(1,1-dioxidobenzo[d]isothiazol-3-yl)phosphonate (**2k**) (35.1 mg, 0.11 mmol) and  $\beta$ -ICD (6.8 mg, 0.022 mol) at  $-25\text{ }^{\circ}\text{C}$  under nitrogen atmosphere. After stirring  $-25\text{ }^{\circ}\text{C}$  for 24 h, toluene (10 mL) was added to the mixture. Subsequently the diluted reaction mixture was filtrated with a pad of silica gel using EtOAc as an eluent, the filtrate was condensed *in vacuo*, the obtained residue was purified by  $\text{SiO}_2$  column chromatography (eluent: EtOAc/*n*-hexane = 1/3) to give the title compound **3kb** (43.2 mg, quant).

$^1\text{H-NMR}$  (400 MHz,  $\text{CDCl}_3$ )  $\delta$  7.88-7.83 (m, 2H), 7.77-7.68 (m, 2H), 5.81 (brs, 1H), 5.10-4.89 (m, 2H), 4.87-4.85 (m, 1H), 4.45-4.37 (m, 1H), 1.37 (d,  $J = 6.0$  Hz, 3H), 1.30 (d,  $J = 6.0$  Hz, 3H), 1.27 (d,  $J = 6.0$  Hz, 3H), 0.83 (d,  $J = 6.0$  Hz, 3H);  $^{13}\text{C-NMR}$  (100 MHz,  $\text{CDCl}_3$ )  $\delta$  135.4 (d,  $J_{\text{C-P}} = 4.8$  Hz), 133.7, 131.9 (d,  $J_{\text{C-P}} = 4.8$  Hz), 125.4, 122.2, 78.0 (d,  $J_{\text{C-P}} = 9.6$  Hz), 75.1 (d,  $J_{\text{C-P}} = 7.6$  Hz), 75.0 (d,  $J_{\text{C-P}} = 7.6$  Hz), 62.4 (d,  $J_{\text{C-P}} = 162$  Hz), 24.3 (d,  $J_{\text{C-P}} = 5.8$  Hz), 24.2 (d,  $J_{\text{C-P}} = 5.8$  Hz), 23.7 (d,  $J_{\text{C-P}} = 5.8$  Hz), 23.0 (d,  $J_{\text{C-P}} = 5.8$  Hz);  $^{31}\text{P NMR}$  (240 MHz,  $\text{CDCl}_3$ )  $\delta$  ; HRMS (ESI) calcd for  $m/z$  415.0699: ( $[\text{M}+\text{Na}^+]$ ), found  $m/z$  415.0700; IR (KBr) 3102, 1562, 1376, 1306, 1230, 1016  $\text{cm}^{-1}$ ;  $[\alpha]_{\text{D}}^{25} = +6.8$  (c 6.5  $\text{CHCl}_3$  for 24% ee); HPLC conditions: Daicel Chiralpak IE column, *n*-hexane/*i*PrOH = 50/50, 1.0 mL/min, 275 nm,  $t_{\text{R}} = 14.7$  min (minor isomer) and 20.8 min (major isomer).

### General procedure for the electrochemical synthesis of cyclic sulfonyl ketamine **2o** with one gram of **1o**

In a reaction vessel (12 mL) equipped with a stirring bar, a mixture of the substrate **1o** (1.0 g, 4.44 mmol),  $\text{LiClO}_4$  (1.14 mmol), and MeCN (6.0 mL) were added. The cell was equipped with platinum plates as the cathode and anode and performed in a KIKUSUI PMX 35-1A. The reaction mixture was stirred and electrolyzed at a constant current of 20 mA at  $40\text{ }^{\circ}\text{C}$  for 16 h. Upon completion, the solvent was removed under reduced pressure to afford the crude product, which was dissolved in AcOEt and washed with distilled water, and dried over  $\text{Na}_2\text{SO}_4$ . After removal solvent under reduced pressure, the residue was further purified by silica gel chromatography (Hexane/Acetone = 4/1) to afford the desired products **2o** (53%, 521 mg).



## Cyclic voltammograms

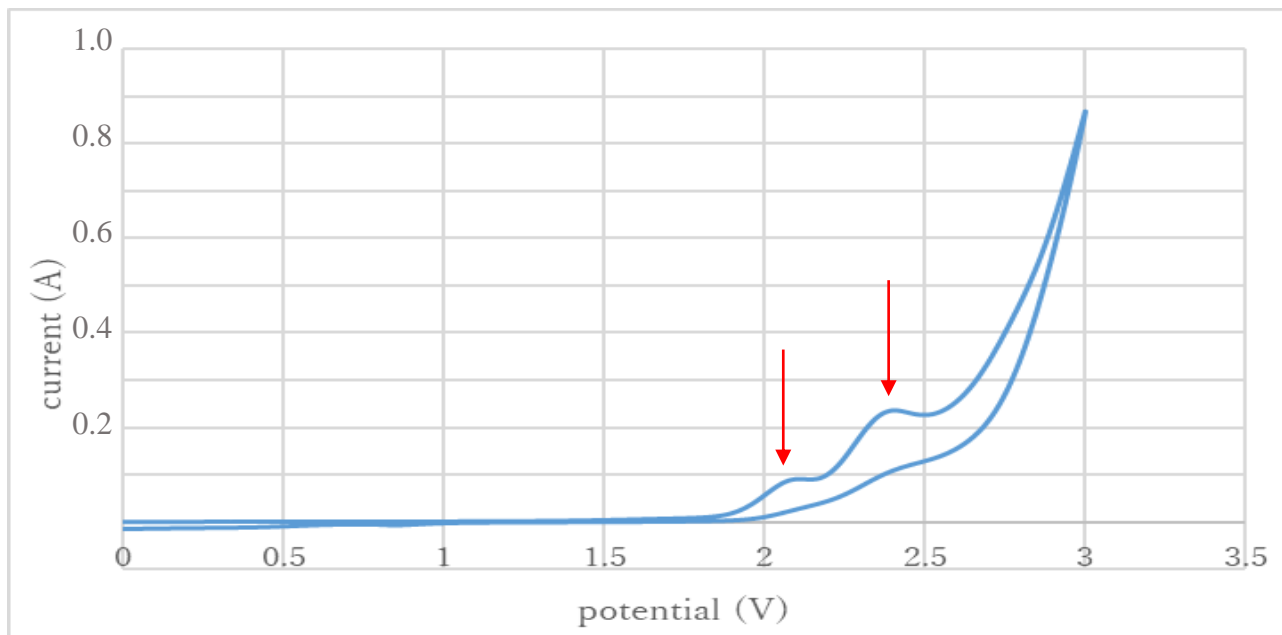

**Fig. S2A** Cyclic voltammetry analysis of **1n** (5 mM in MeCN). Conditions: a glassy carbon working electrode, a Ag/AgNO<sub>3</sub> reference electrode, and a platinum wire counter electrode, LiClO<sub>4</sub> (0.1 M in MeCN), 100 mV/s scan rate

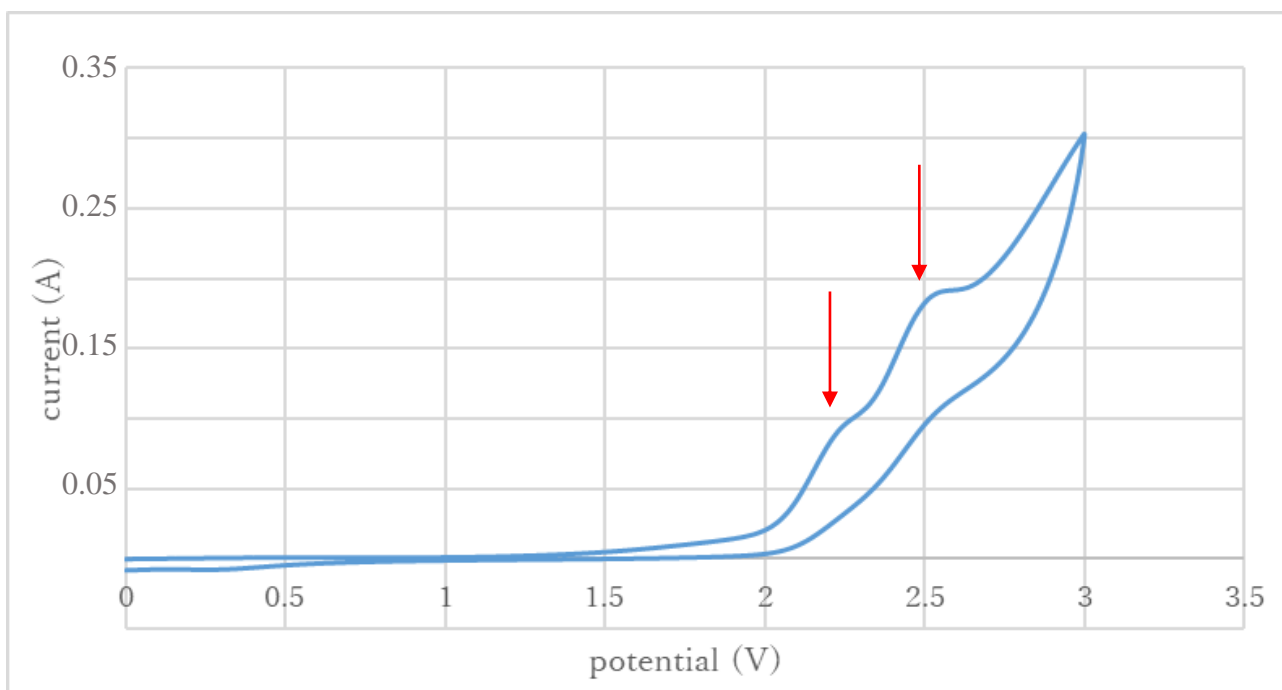

**Fig. S2B** Cyclic voltammetry analysis of **1n** (5 mM in MeCN). Conditions: a glassy carbon working electrode, a Ag/AgNO<sub>3</sub> reference electrode, and a platinum wire counter electrode, <sup>t</sup>Bu<sub>4</sub>NPF<sub>6</sub> (0.1 M in MeCN), 100 mV/s scan rate

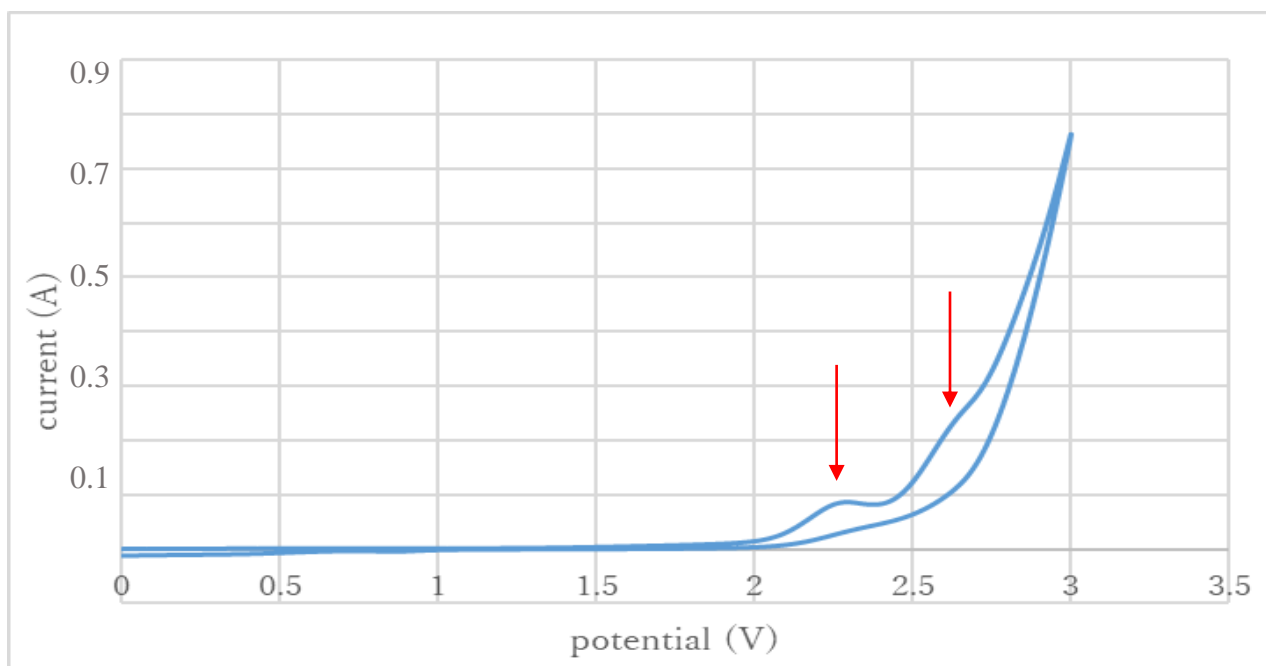

**Fig. S2C** Cyclic voltammetry analysis of **1o** (5 mM in MeCN). Conditions: a glassy carbon working electrode, a  $\text{Ag}/\text{AgNO}_3$  reference electrode, and a platinum wire counter electrode,  $\text{LiClO}_4$  (0.1 M in MeCN), 100 mV/s scan rate

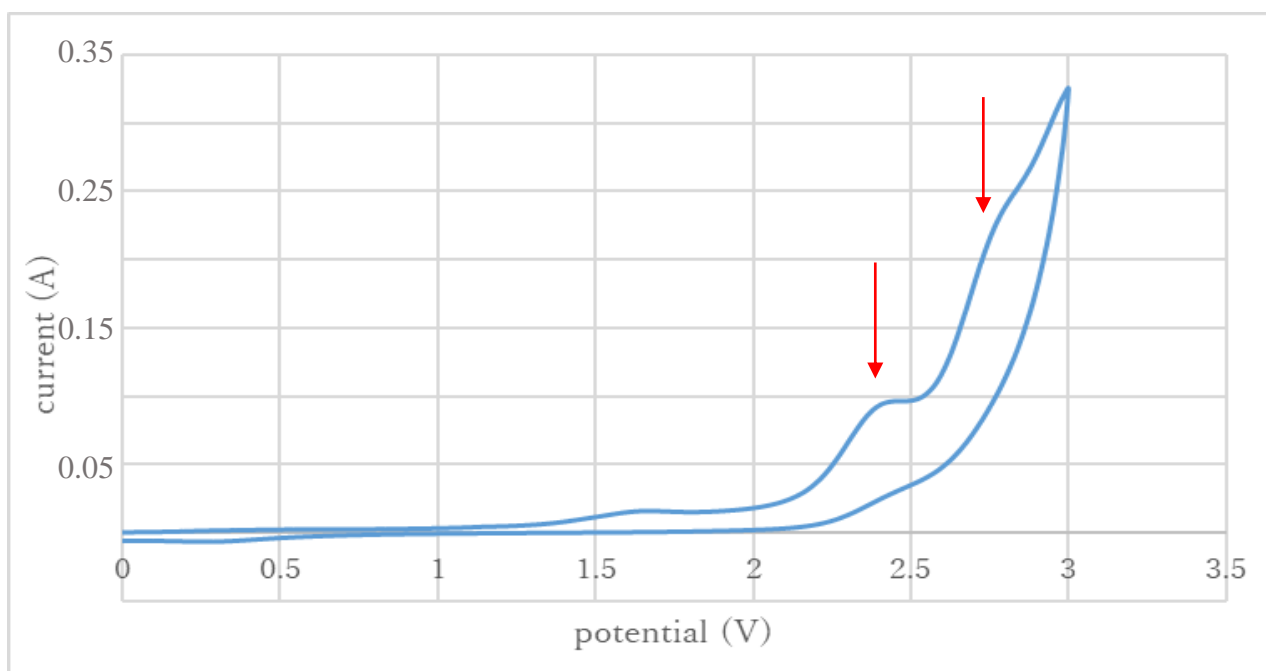

**Fig. S2D** Cyclic voltammetry analysis of **1o** (5 mM in MeCN). Conditions: a glassy carbon working electrode, a  $\text{Ag}/\text{AgNO}_3$  reference electrode, and a platinum wire counter electrode,  $\text{Bu}_4\text{NPF}_6$  (0.1 M in MeCN), 100 mV/s scan rate

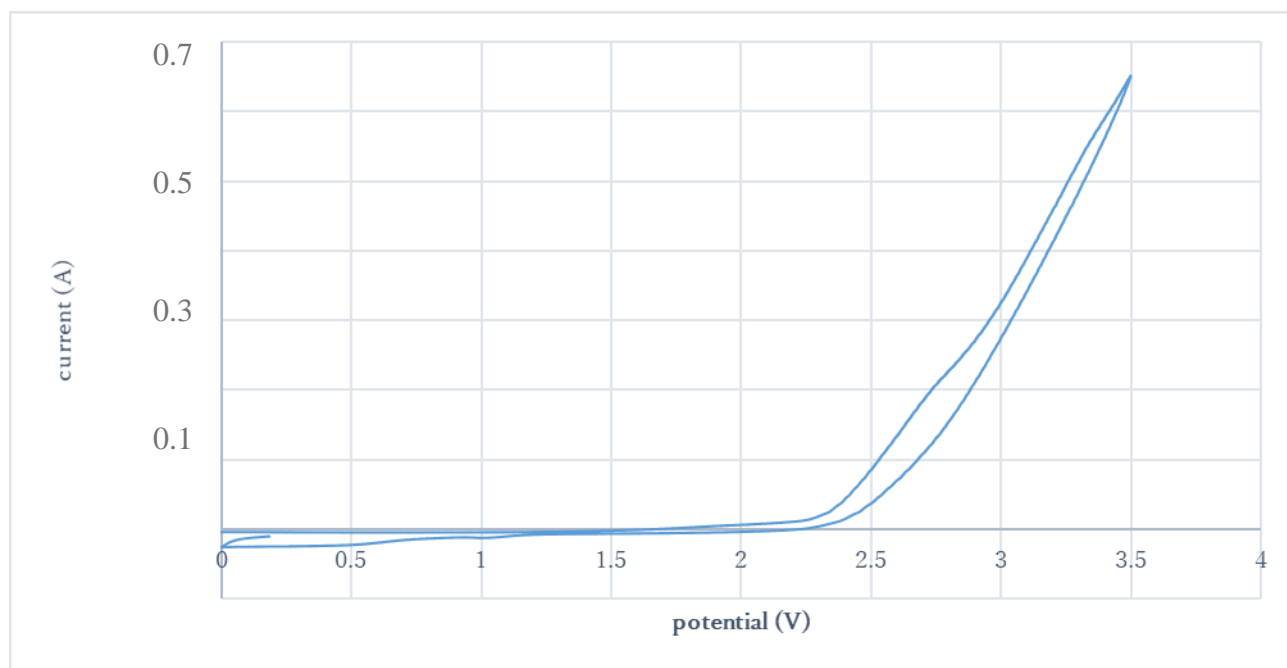

**Fig. S2E** Cyclic voltammetry analysis of **2n** (5 mM in MeCN). Conditions: a glassy carbon working electrode, a Ag/AgNO<sub>3</sub> reference electrode, and a platinum wire counter electrode, LiClO<sub>4</sub> (0.1 M in MeCN), 100 mV/s scan rate

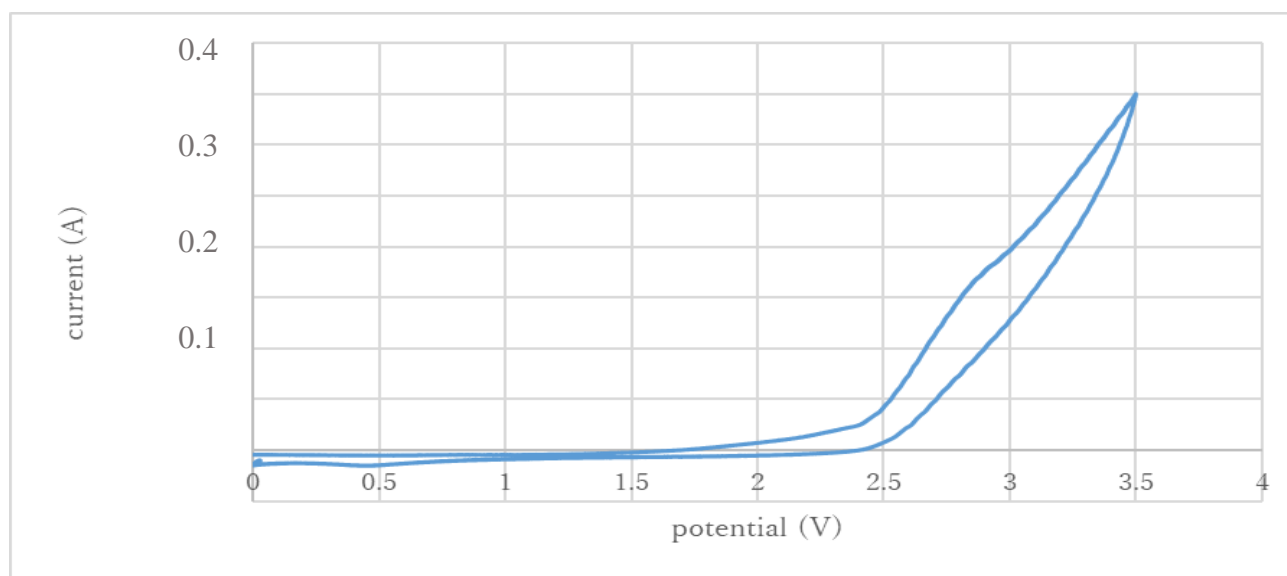

**Fig. S2F** Cyclic voltammetry analysis of **2n** (5 mM in MeCN). Conditions: a glassy carbon working electrode, a Ag/AgNO<sub>3</sub> reference electrode, and a platinum wire counter electrode, <sup>t</sup>Bu<sub>4</sub>NPF<sub>6</sub> (0.1 M in MeCN), 100 mV/s scan rate

## References

1. (a) Z. Yan, B. Wu, X. Gao, M.-W. Chen and Y.-G. Zhou, *Org. Lett.*, 2016, **18**, 692–695; (b) Z.-Y. Ming, K.-R. Li, F.-J. Meng, L. Shi and W.-F. Jiang, *Tetrahedron Lett.*, 2020, **61**, 152059.
2. Y. Iwabuchi, M. Nakatani, N. Yokoyama and S. Hatakeyama, *J. Am. Chem. Soc.*, 1999, **121**, 10219–20220.
3. K. Matsui, S. Takizawa and H. Sasai, *J. Am. Chem. Soc.*, 2005, **127**, 3680–3681.
4. J.-J. Gong, T.-Z. Li, K. Pan and X.-Y. Wu, *Chem. Commun.*, 2011, **47**, 1491–1493
5. C. E. Henry, Q. Xu, Y. C. Fan, T. J. Martin, L. Belding, T. Dudding and O. Kwon, *J. Am. Chem. Soc.*, 2014, **136**, 11890–11893.
6. J. Sun, C. Mou, C. Liu, R. Huang, S. Zhang, P. Zheng and Y. R. Chi, *Org. Chem. Front.*, 2018, **5**, 2992–2996.
7. Z. Yan, B. Wu, X. Gao and Y.-G. Zhou, *Chem. Commun.*, 2016, **52**, 10882–10885.
8. C. Schrapel, W. Frey, D. Garnier and R. Peters, *Chem. Eur. J.*, 2017, **23**, 2448–2460.
9. S. A. Lee, S. H. Kwak and K.-I. Lee, *Chem. Commun.*, 2011, **47**, 2372–2374.

NMR charts

<sup>1</sup>H-NMR (400 MHz, CDCl<sub>3</sub>) chart of **2a**

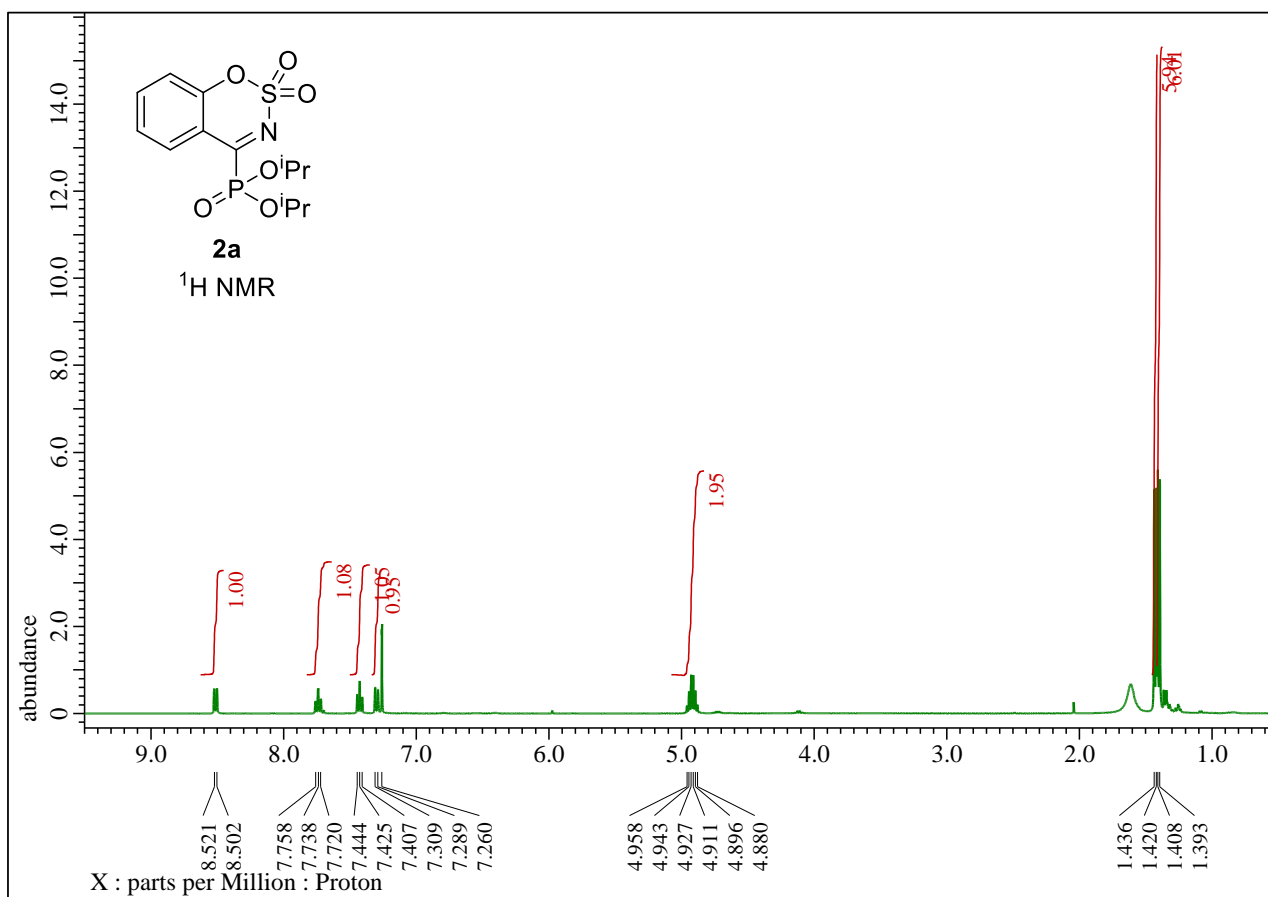

<sup>13</sup>C-NMR (100 MHz, CDCl<sub>3</sub>) chart of **2a**

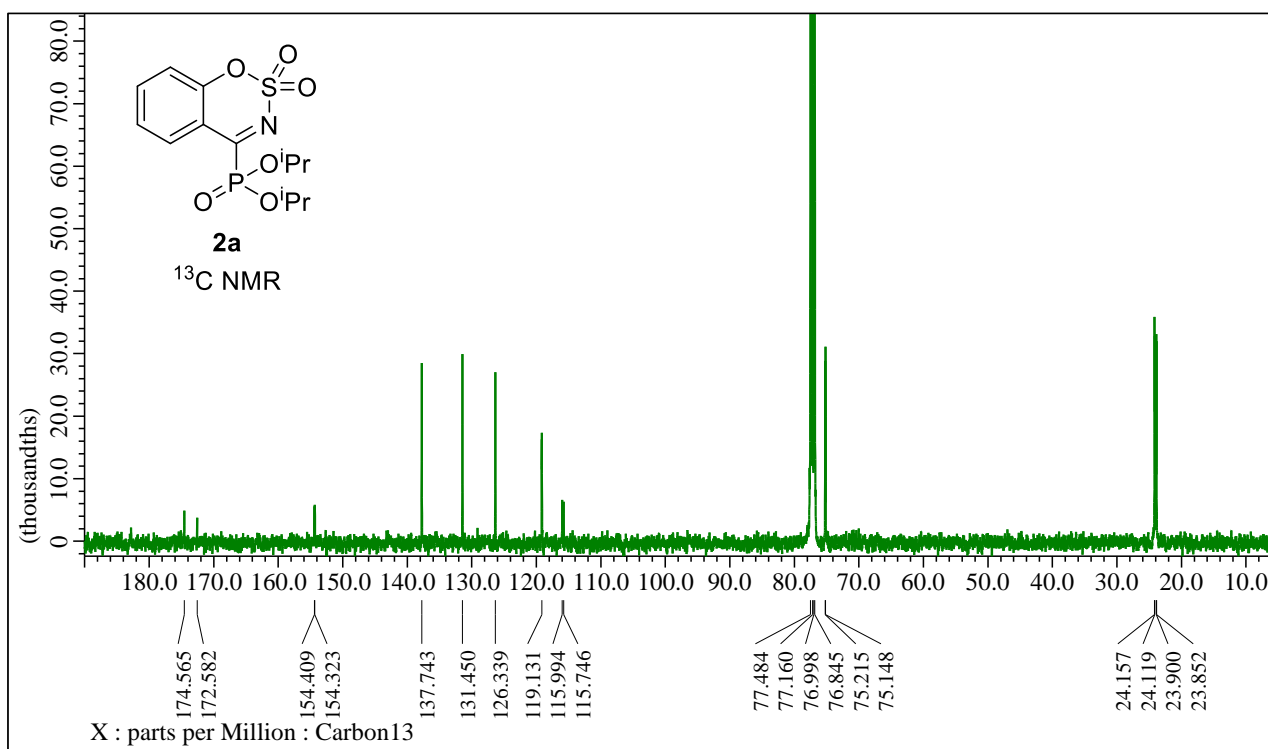

<sup>1</sup>H-NMR (400 MHz, CDCl<sub>3</sub>) chart of **2b**

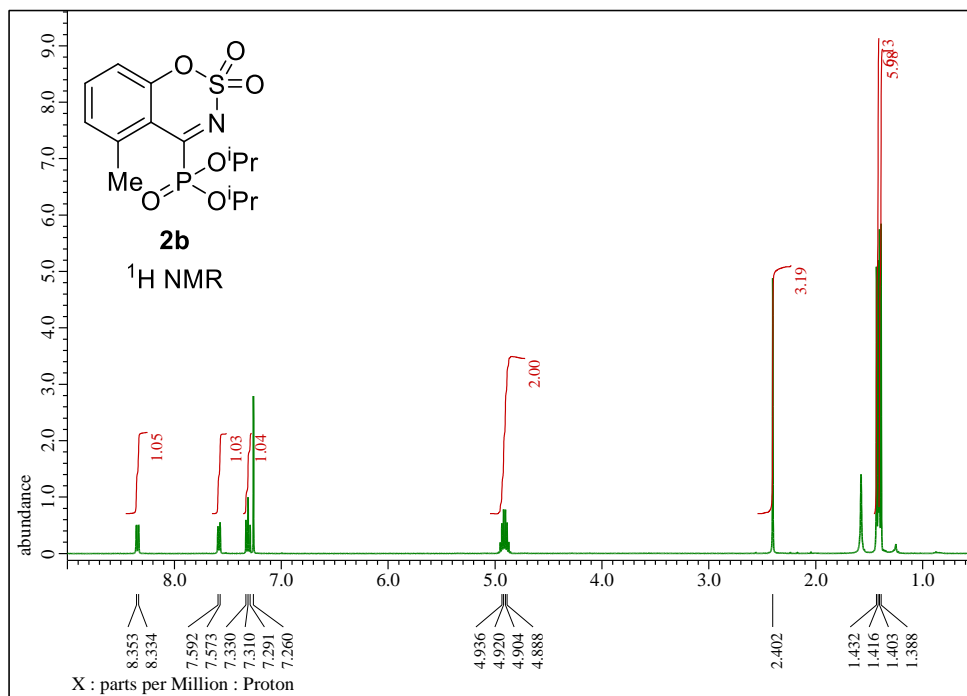

<sup>13</sup>C-NMR (100 MHz, CDCl<sub>3</sub>) chart of **2b**

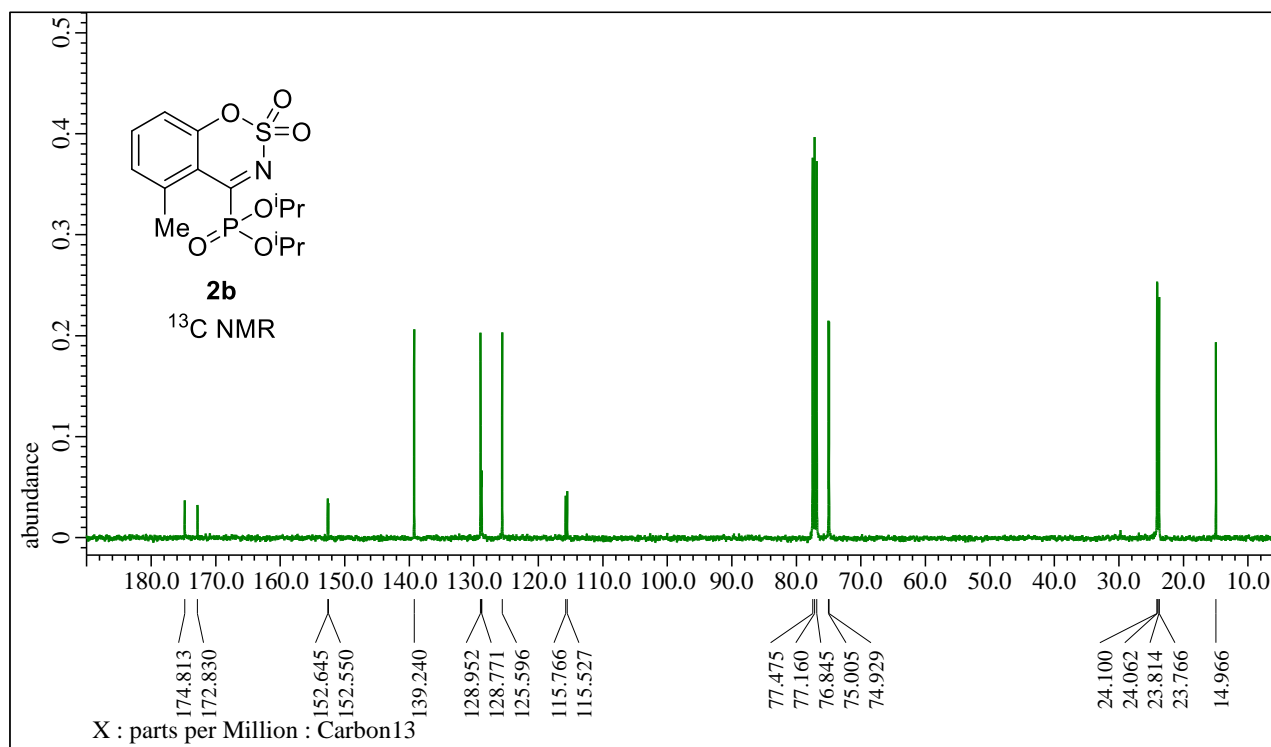

<sup>31</sup>P-NMR (240 MHz, CDCl<sub>3</sub>) chart of **2b**

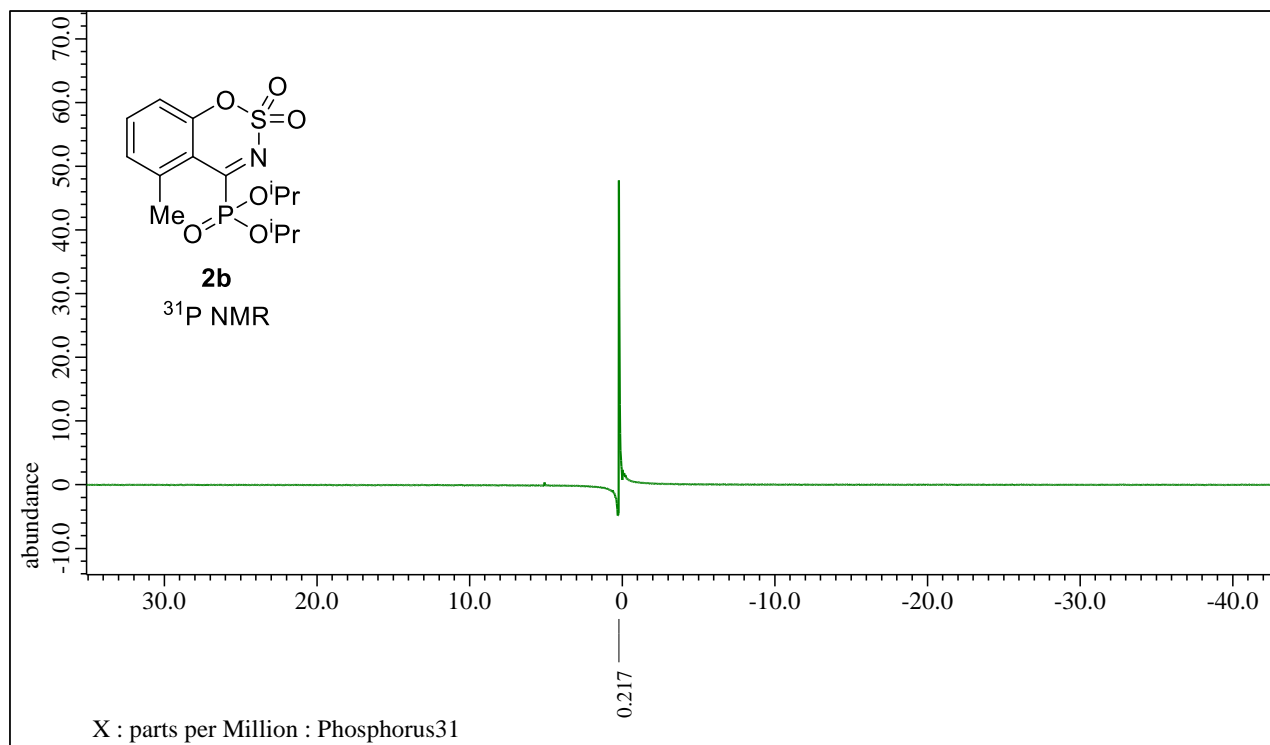

<sup>1</sup>H-NMR (400 MHz, CDCl<sub>3</sub>) chart of **2c**

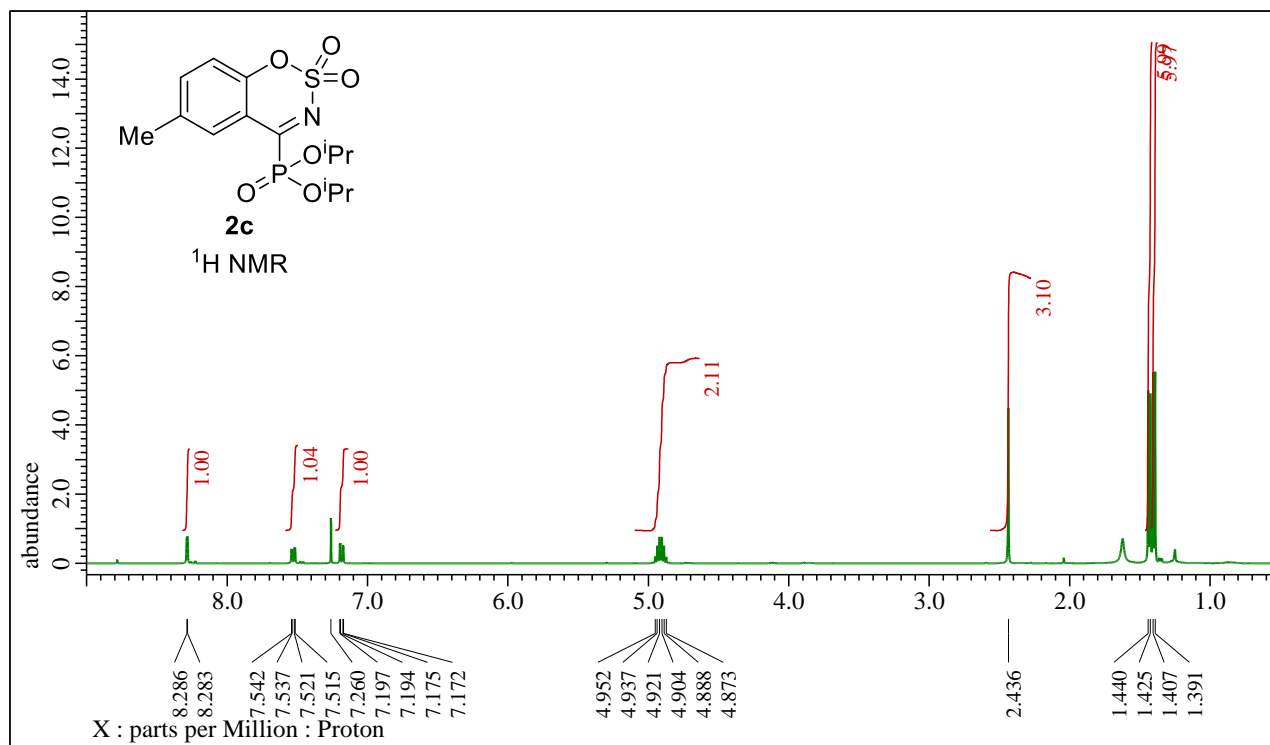

<sup>13</sup>C-NMR (100 MHz, CDCl<sub>3</sub>) chart of **2c**

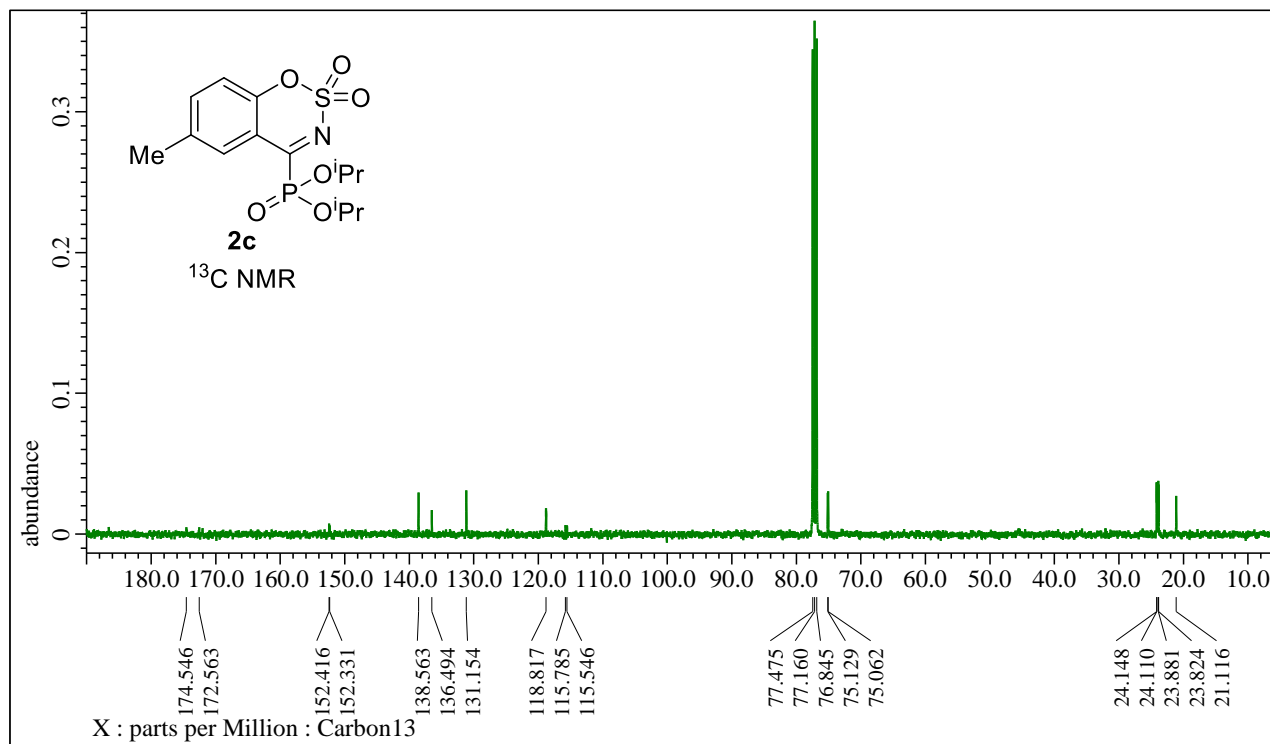





<sup>1</sup>H-NMR (400 MHz, CDCl<sub>3</sub>) chart of **2e**

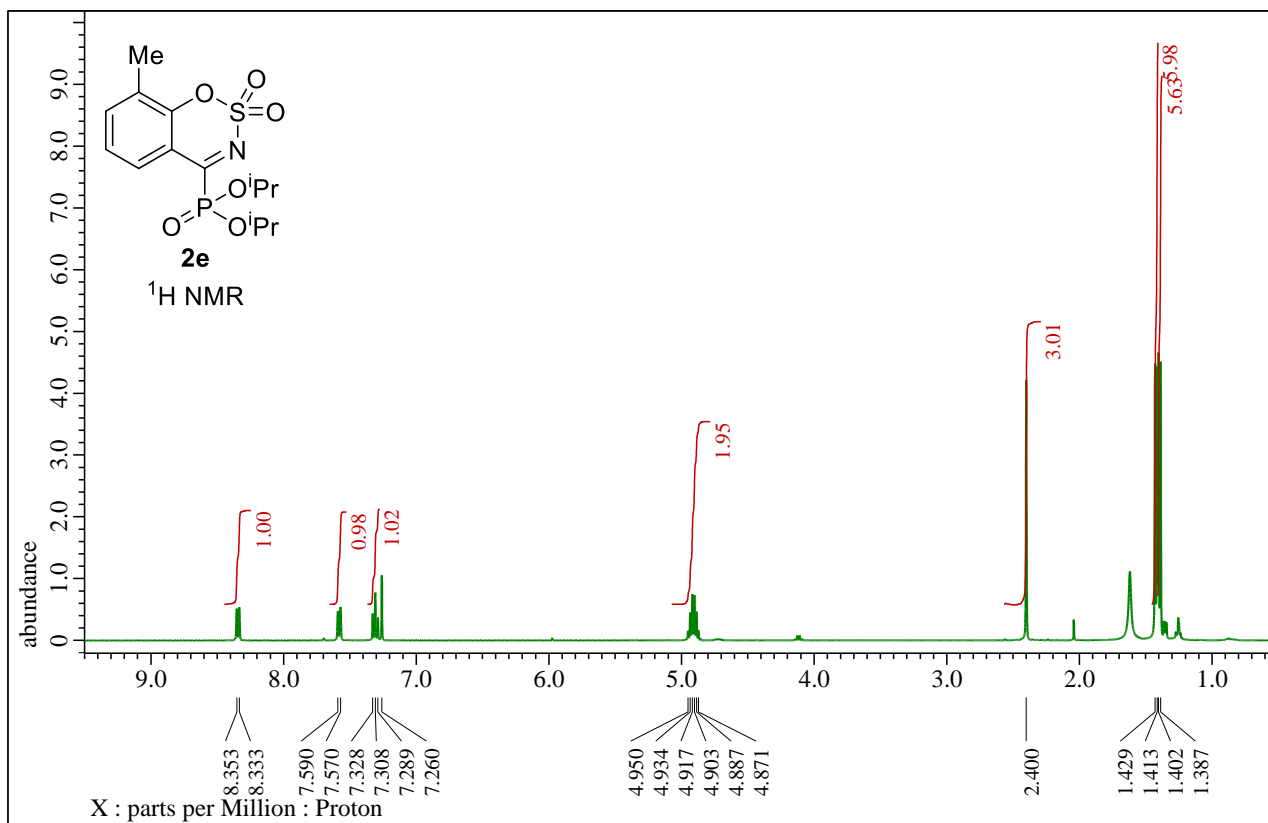

<sup>13</sup>C-NMR (100 MHz, CDCl<sub>3</sub>) chart of **2e**

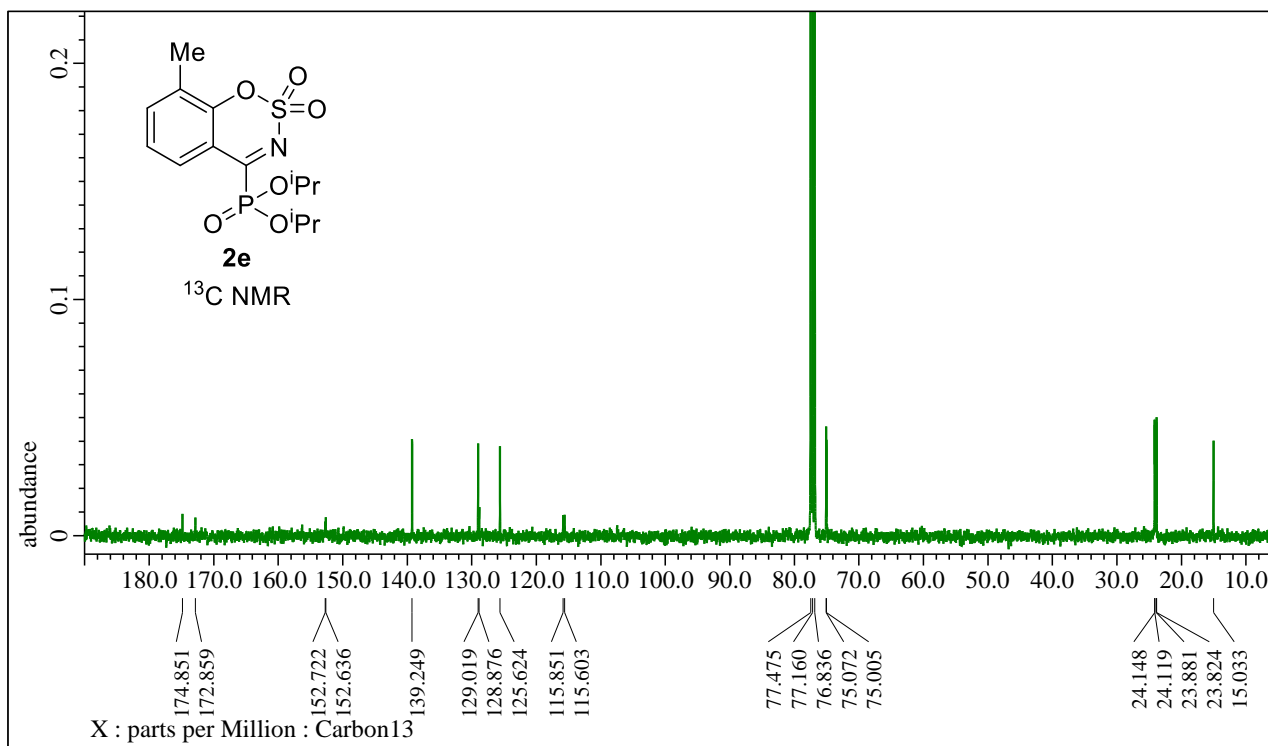

$^{31}\text{P}$ -NMR (240 MHz,  $\text{CDCl}_3$ ) chart of **2e**

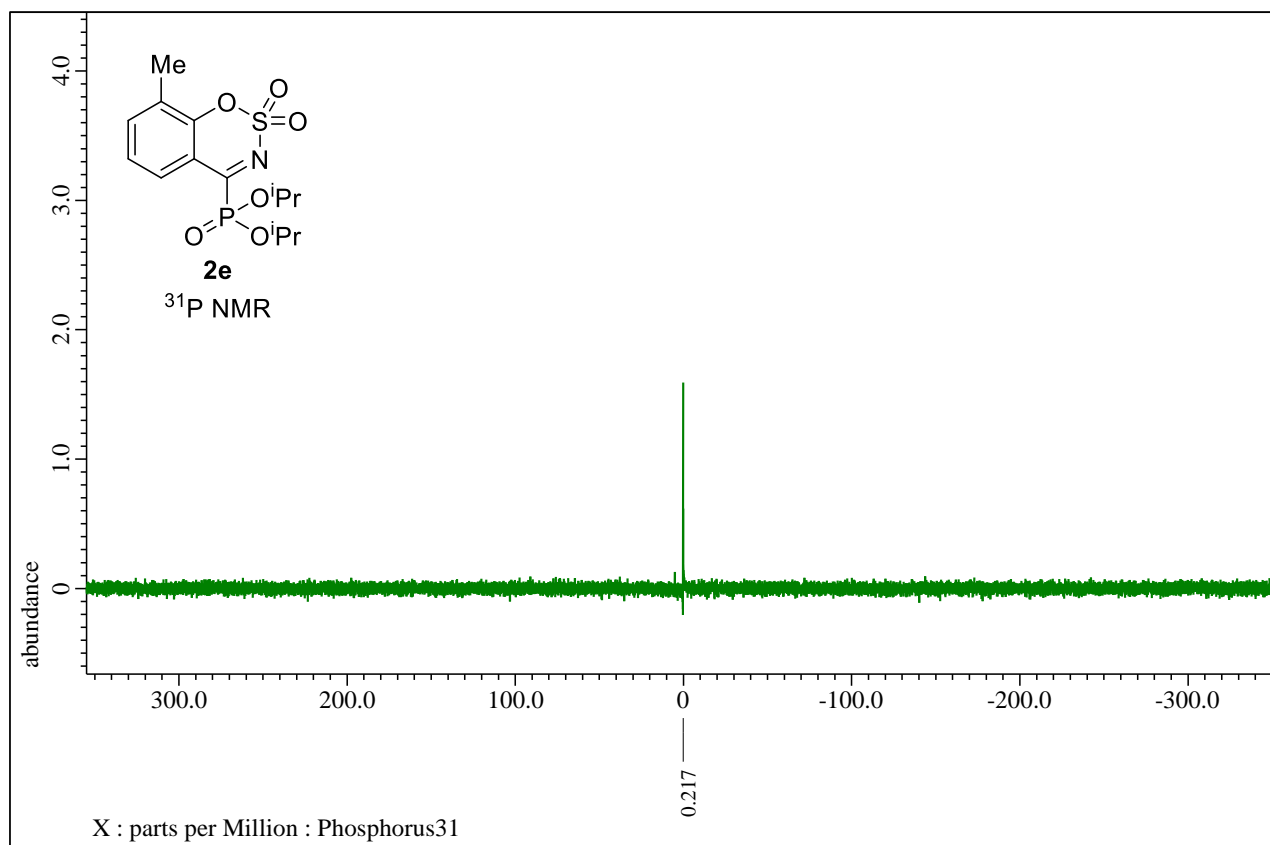

$^1\text{H-NMR}$  (400 MHz,  $\text{CDCl}_3$ ) chart of **2f**

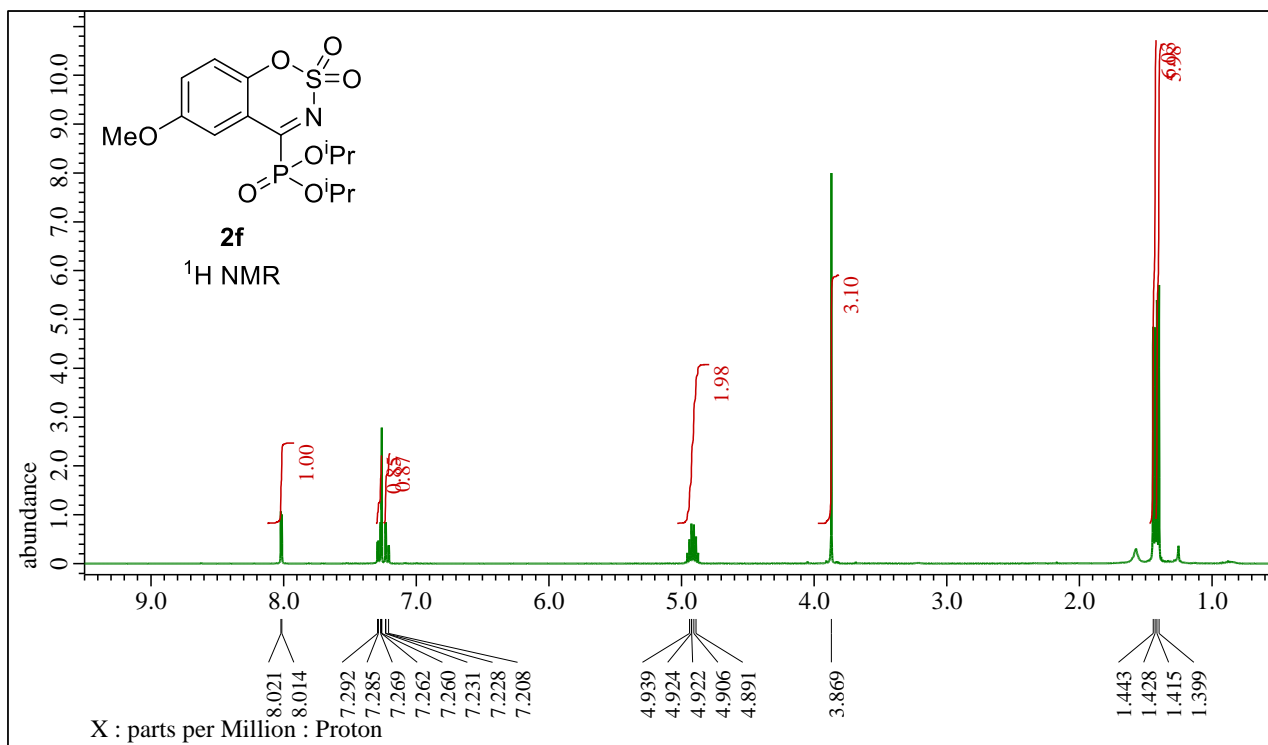

$^{13}\text{C-NMR}$  (100 MHz,  $\text{CDCl}_3$ ) chart of **2f**

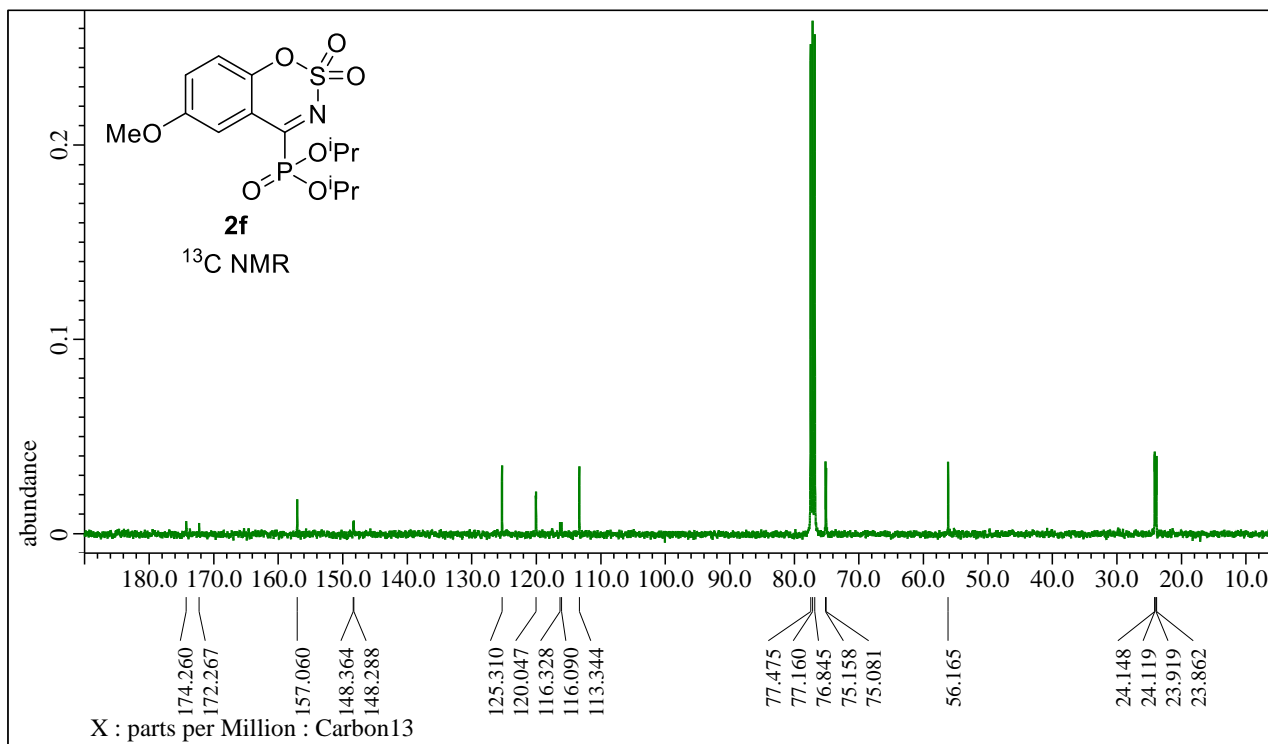

<sup>1</sup>H-NMR (400 MHz, CDCl<sub>3</sub>) chart of **2g**

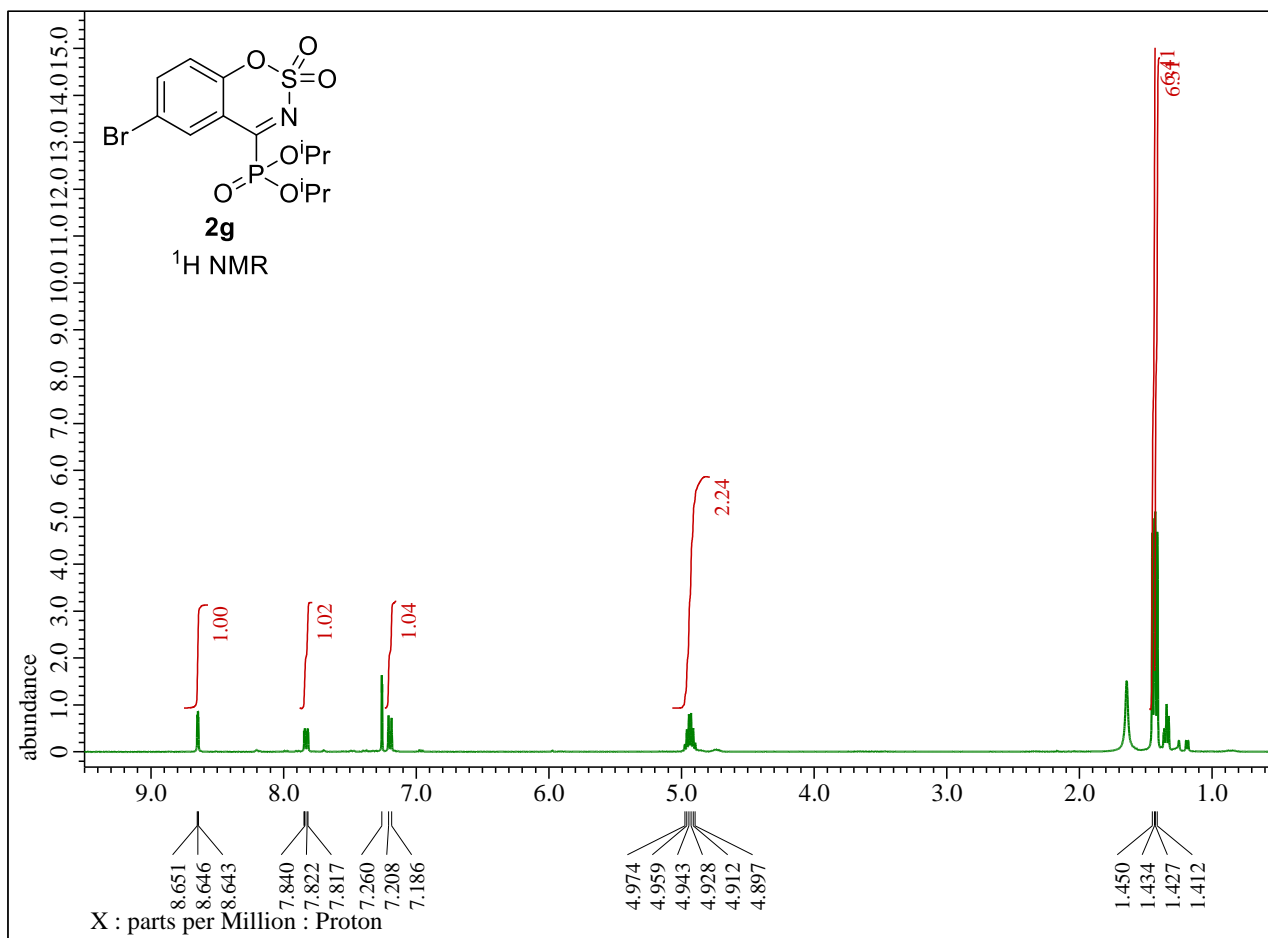

<sup>13</sup>C-NMR (100 MHz, CDCl<sub>3</sub>) chart of **2g**

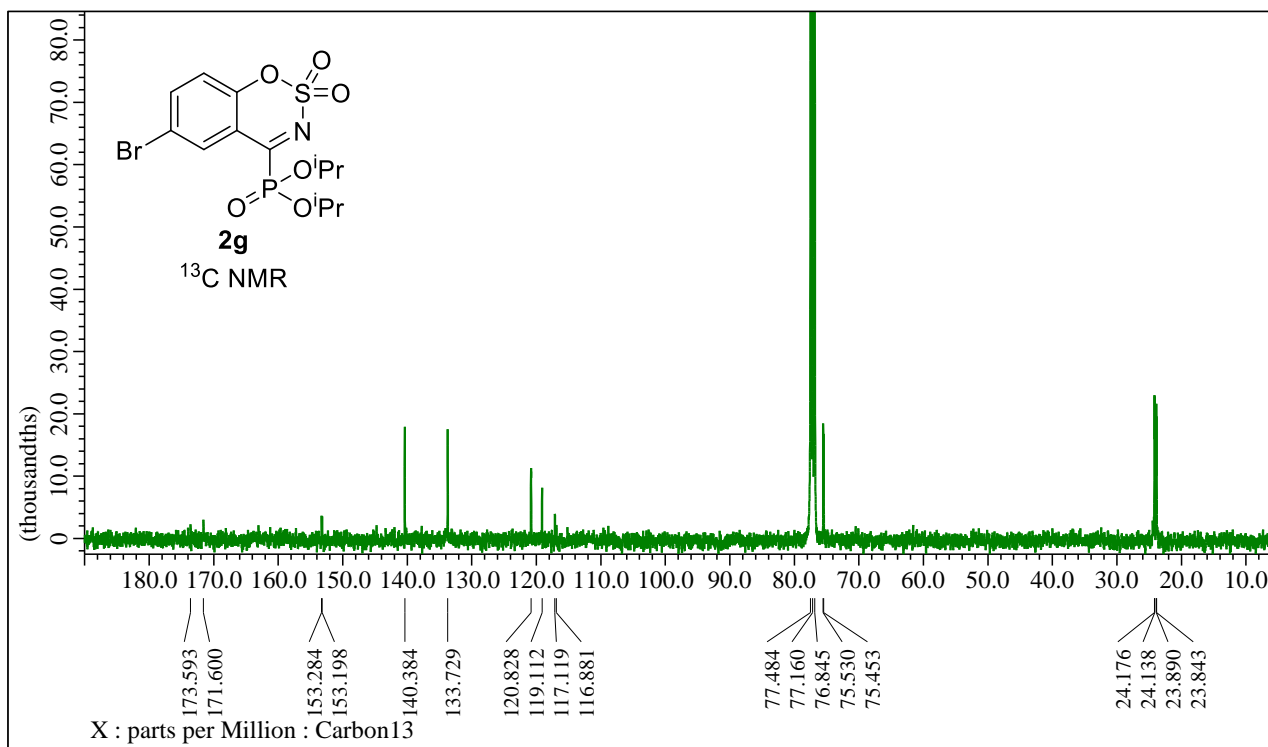

<sup>1</sup>H-NMR (400 MHz, CDCl<sub>3</sub>) chart of **2h**

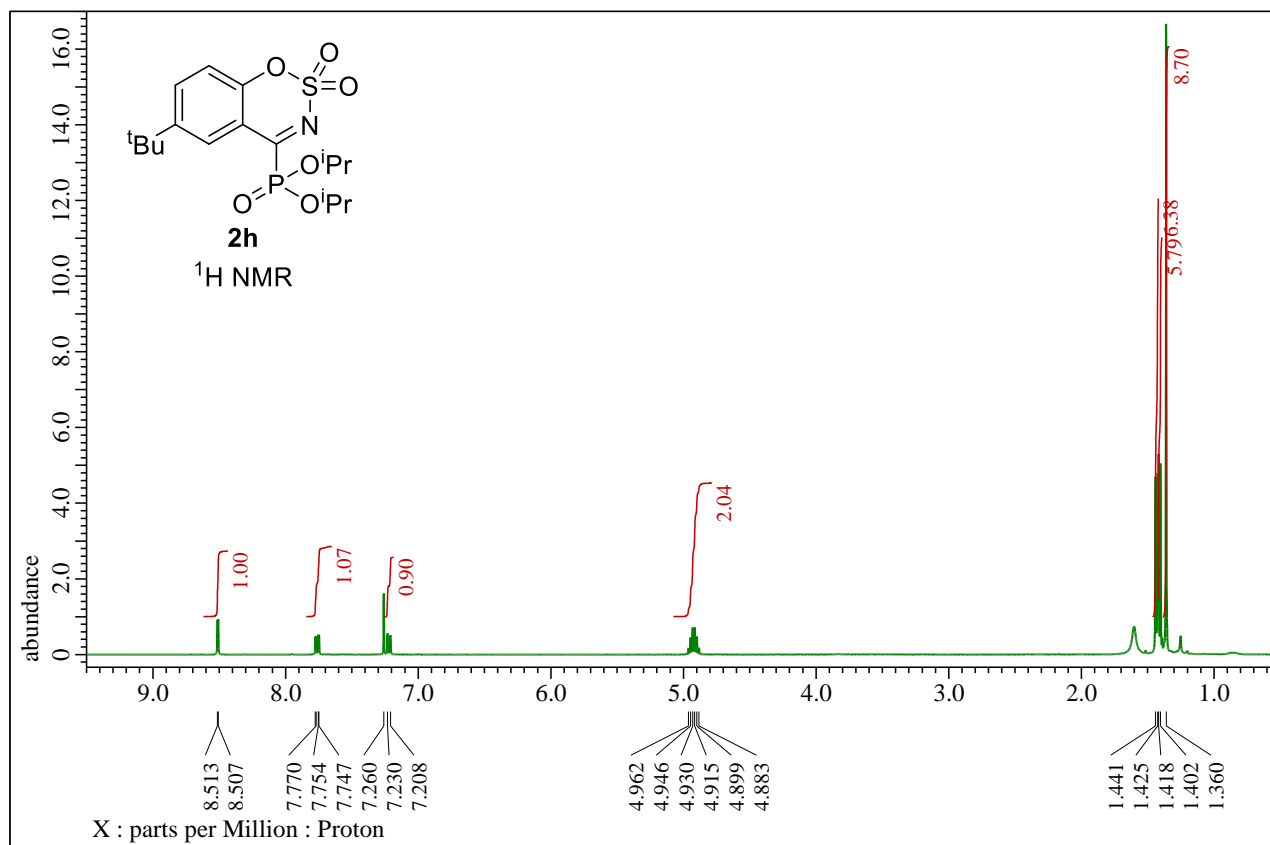

<sup>13</sup>C-NMR (100 MHz, CDCl<sub>3</sub>) chart of **2h**

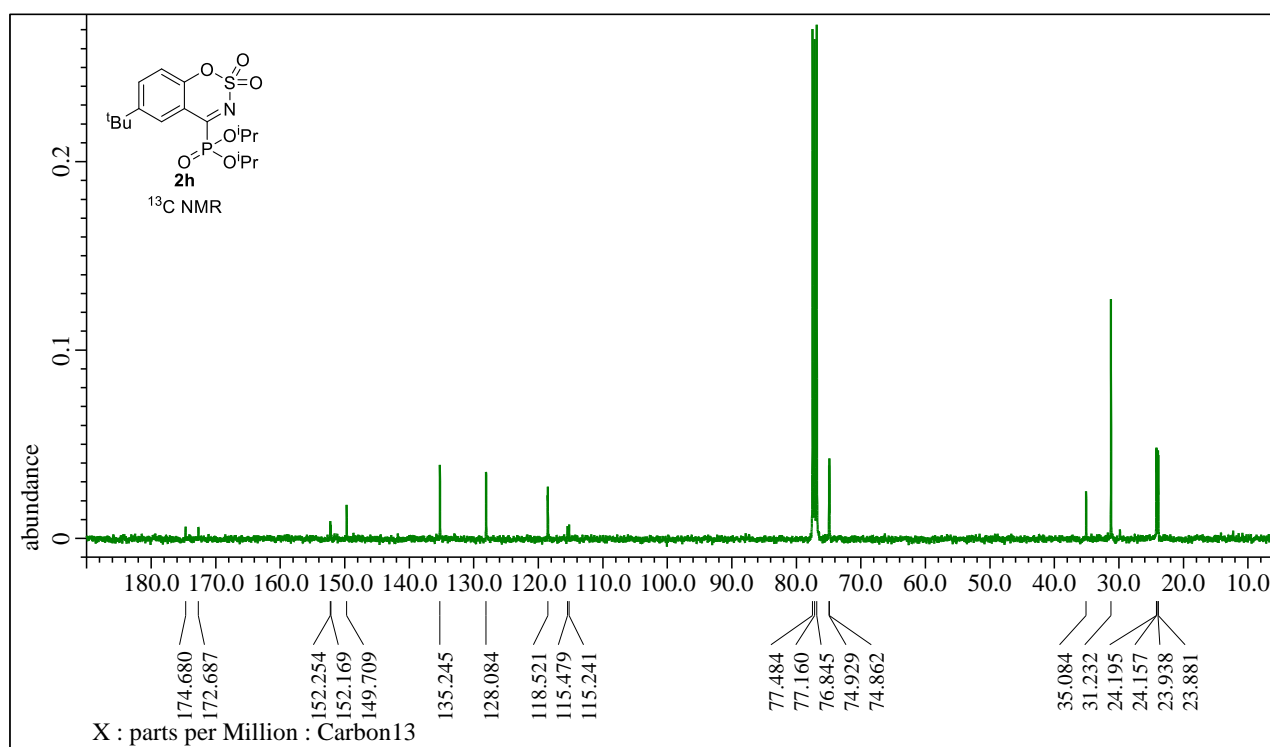

$^{31}\text{P}$ -NMR (240 MHz,  $\text{CDCl}_3$ ) chart of **2h**

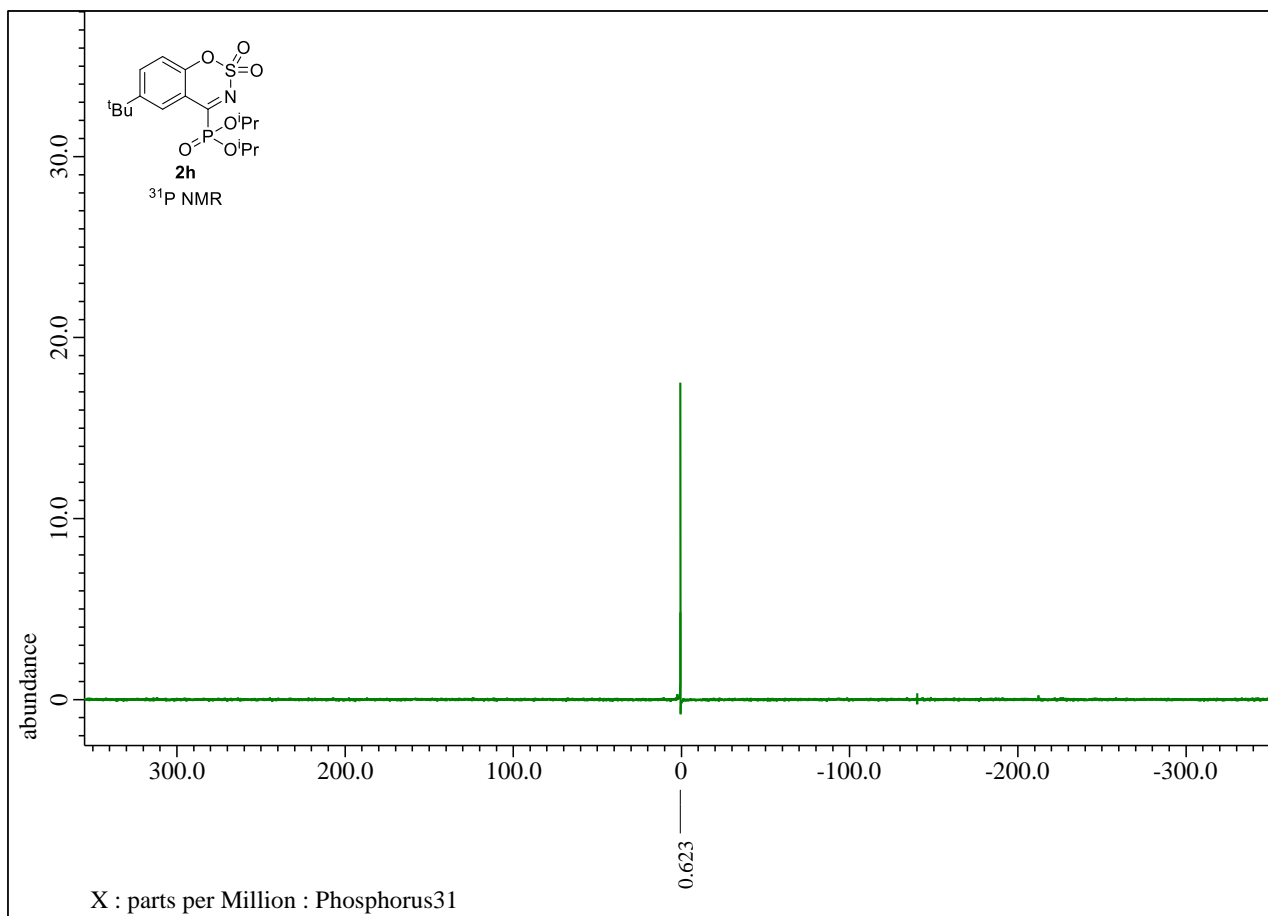

<sup>1</sup>H-NMR (400 MHz, CDCl<sub>3</sub>) chart of **2i**

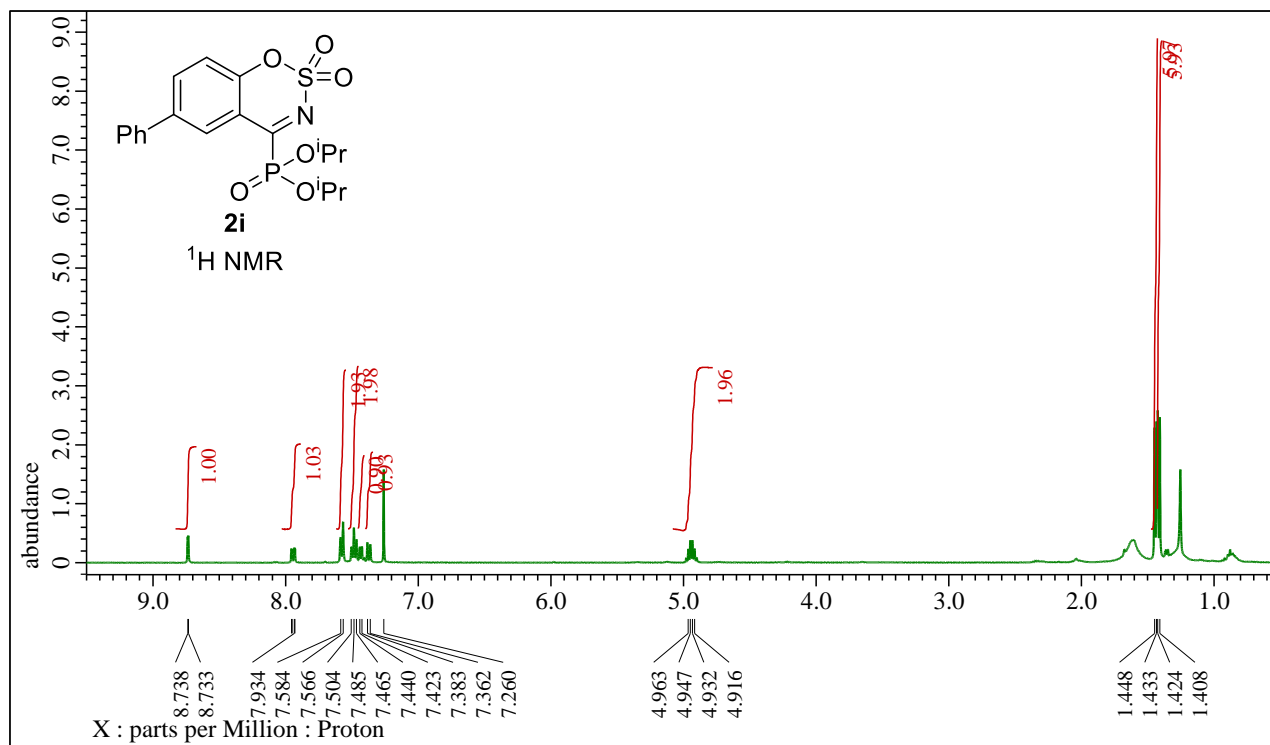

<sup>13</sup>C-NMR (100 MHz, CDCl<sub>3</sub>) chart of **2i**

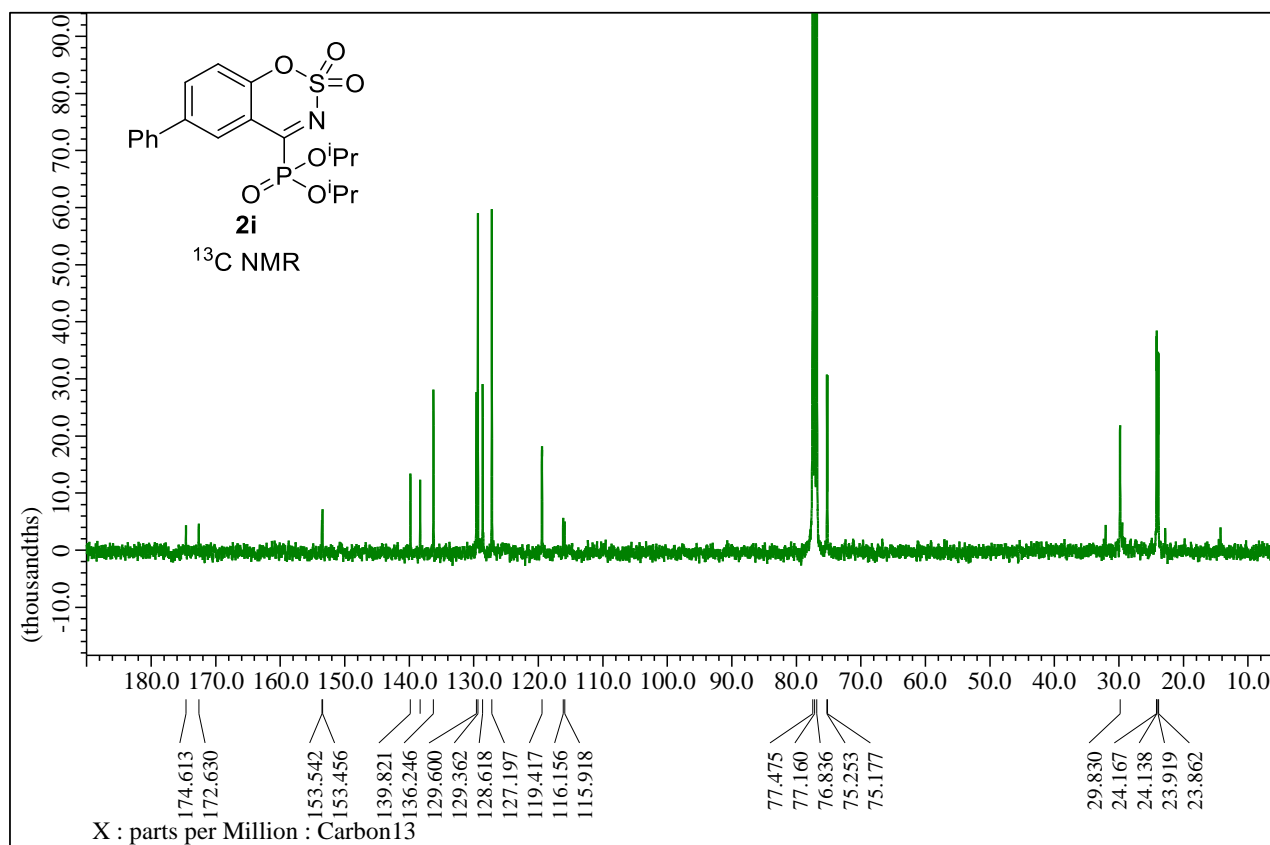



$^{31}\text{P}$ -NMR (240 MHz,  $\text{CDCl}_3$ ) chart of **2i**

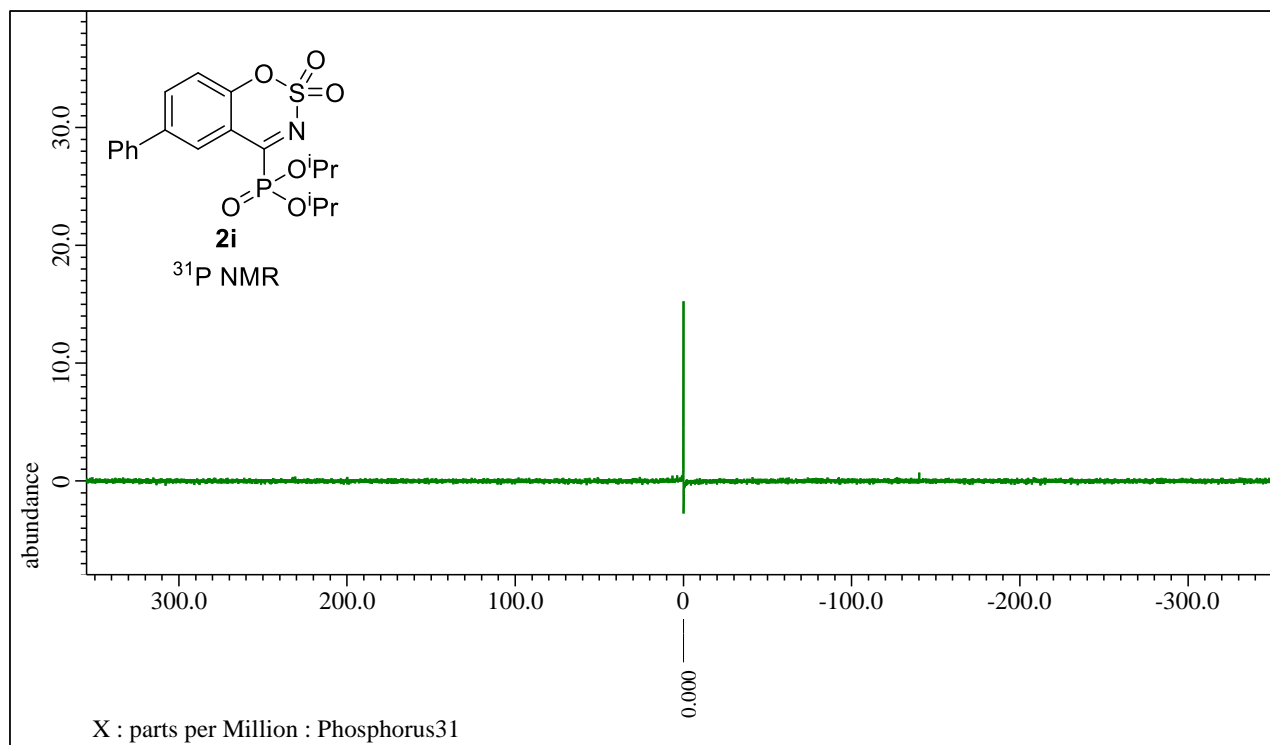

<sup>1</sup>H-NMR (400 MHz, CDCl<sub>3</sub>) chart of **2j**

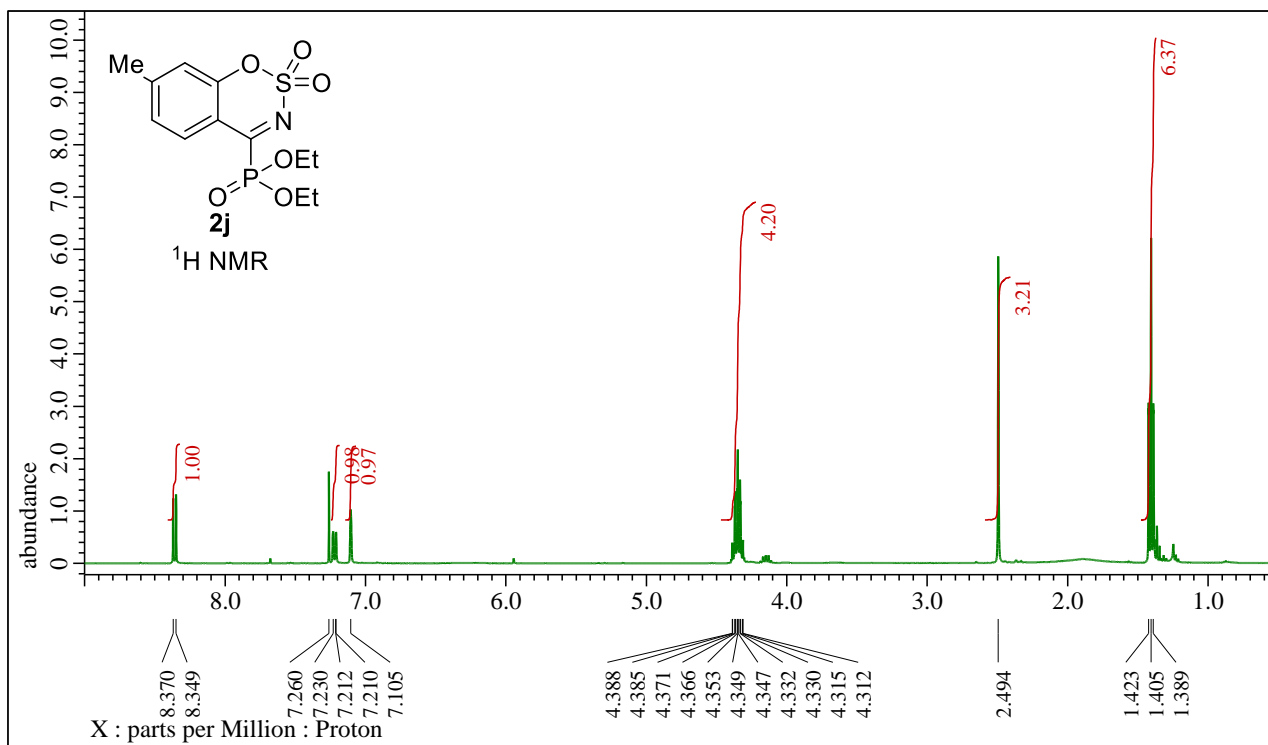

<sup>13</sup>C-NMR (100 MHz, CDCl<sub>3</sub>) chart of **2j**

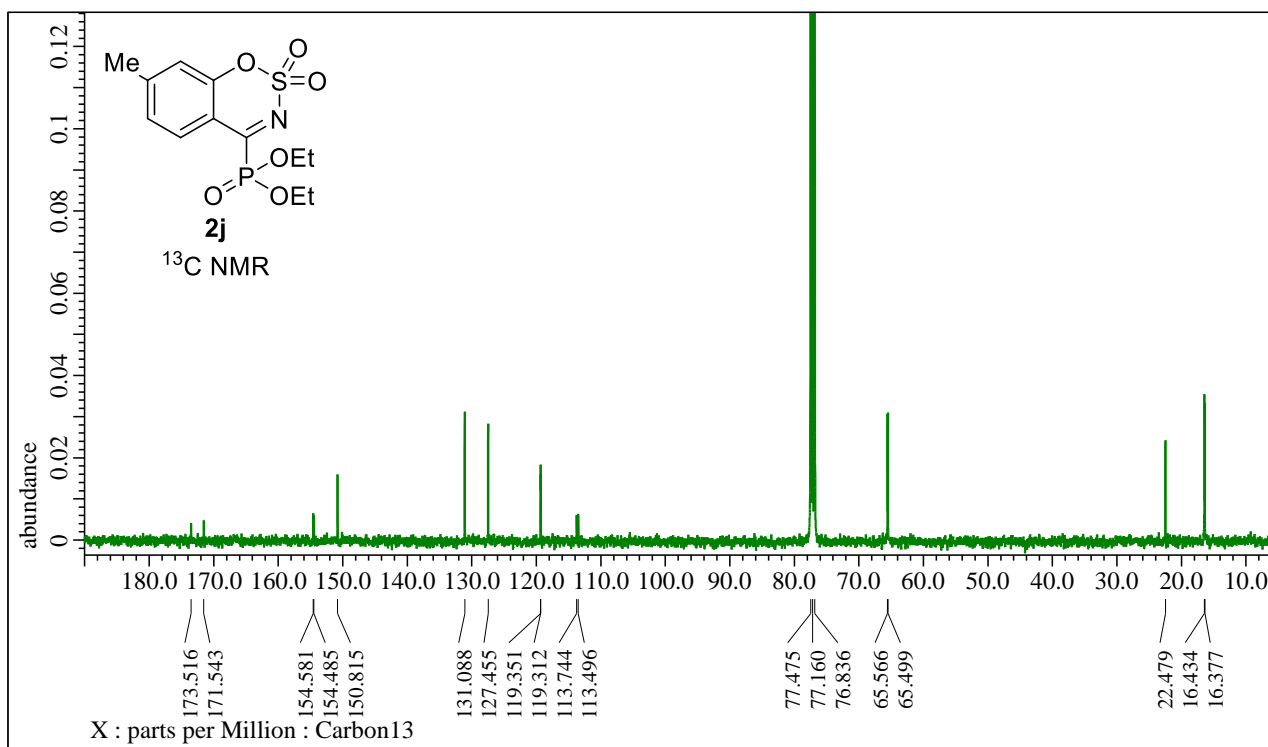

<sup>31</sup>P-NMR (240 MHz, CDCl<sub>3</sub>) chart of **2j**

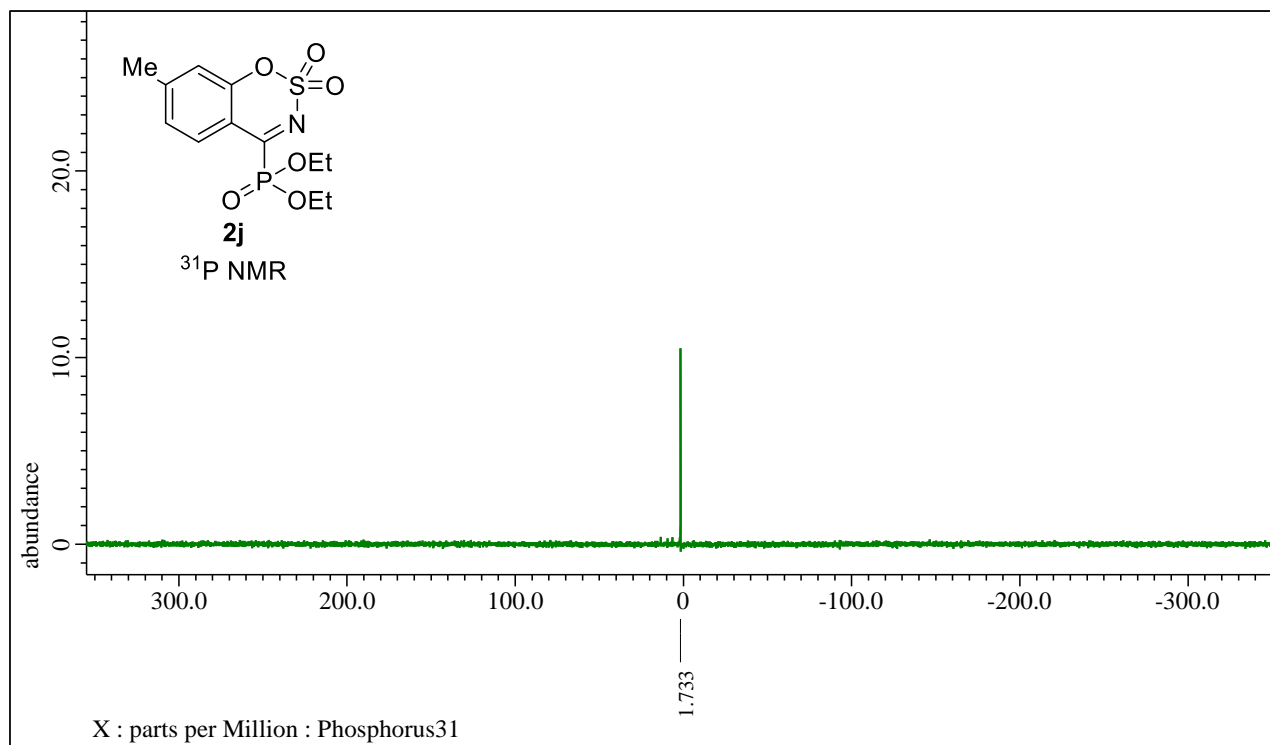

$^1\text{H-NMR}$  (400 MHz,  $\text{CDCl}_3$ ) chart of **2k**

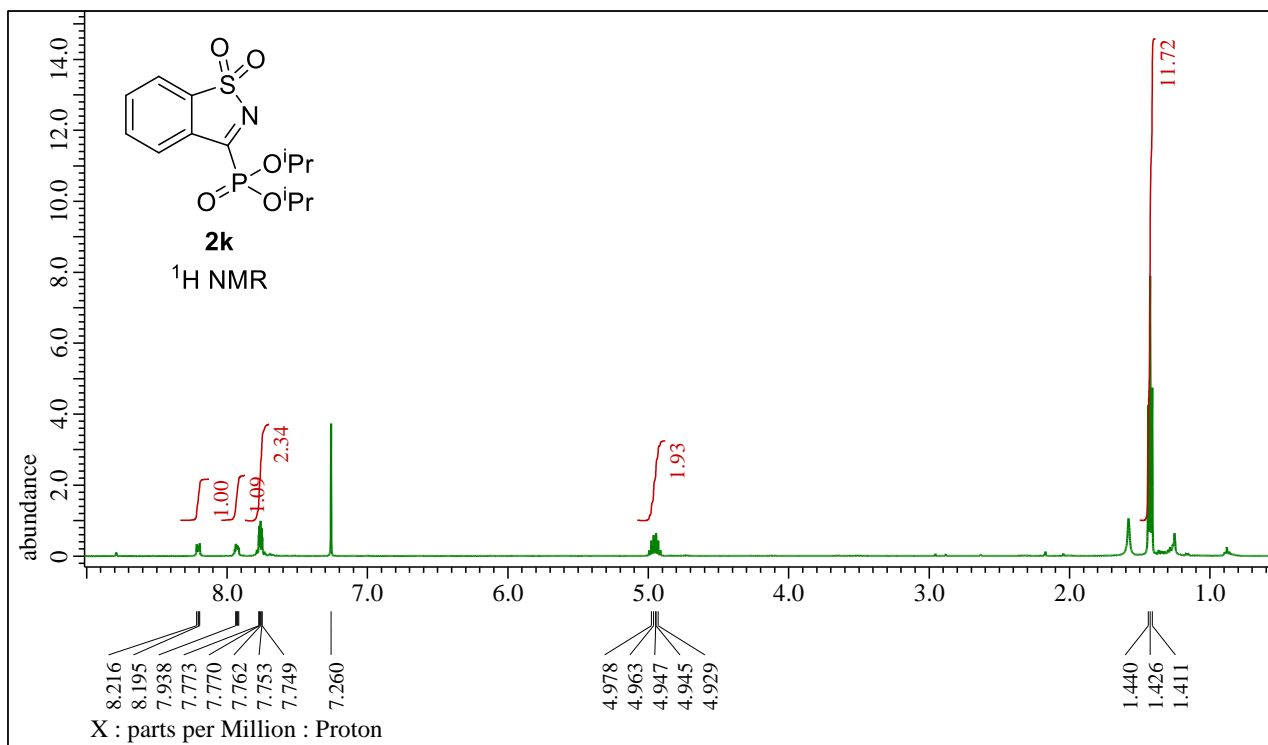

$^{13}\text{C-NMR}$  (100 MHz,  $\text{CDCl}_3$ ) chart of **2k**

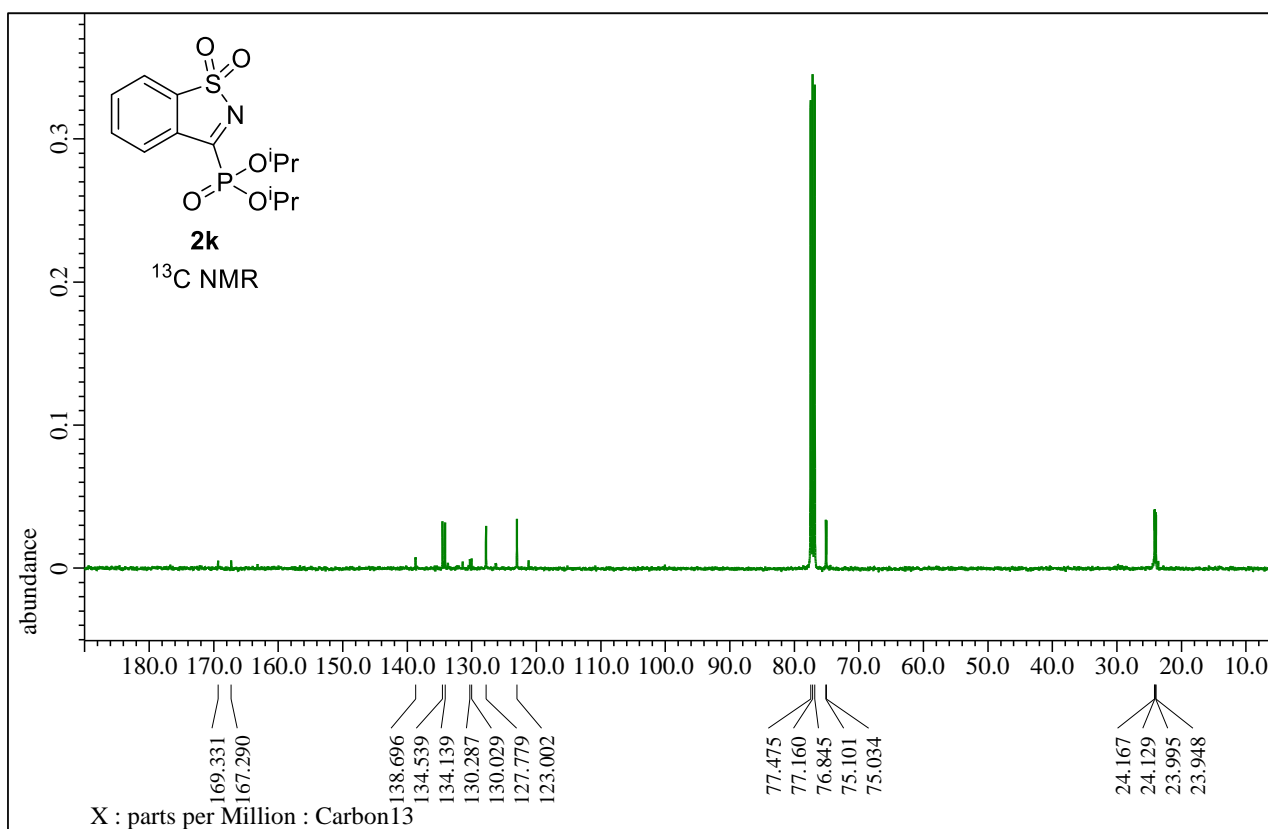

<sup>1</sup>H-NMR (400 MHz, CDCl<sub>3</sub>) chart of **21**

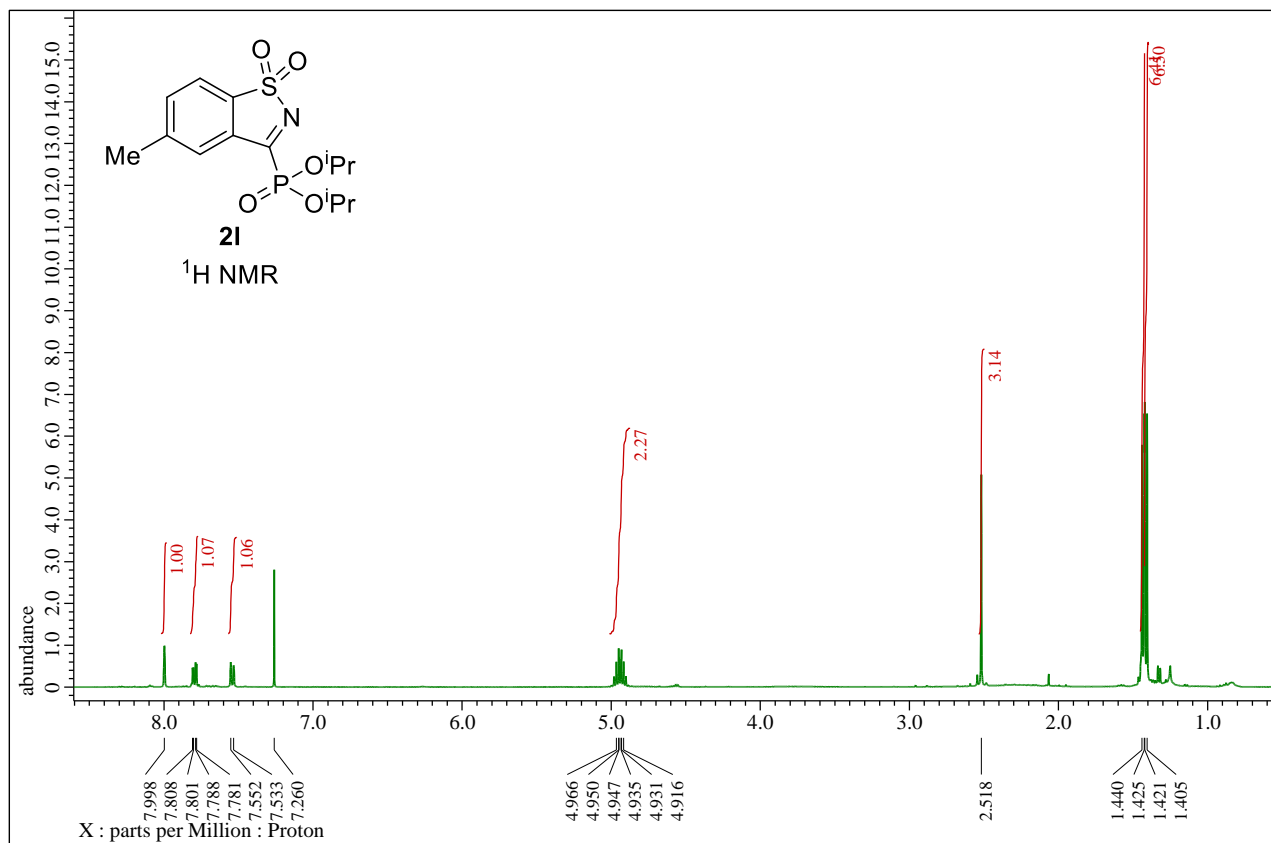

<sup>13</sup>C-NMR (100 MHz, CDCl<sub>3</sub>) chart of **21**

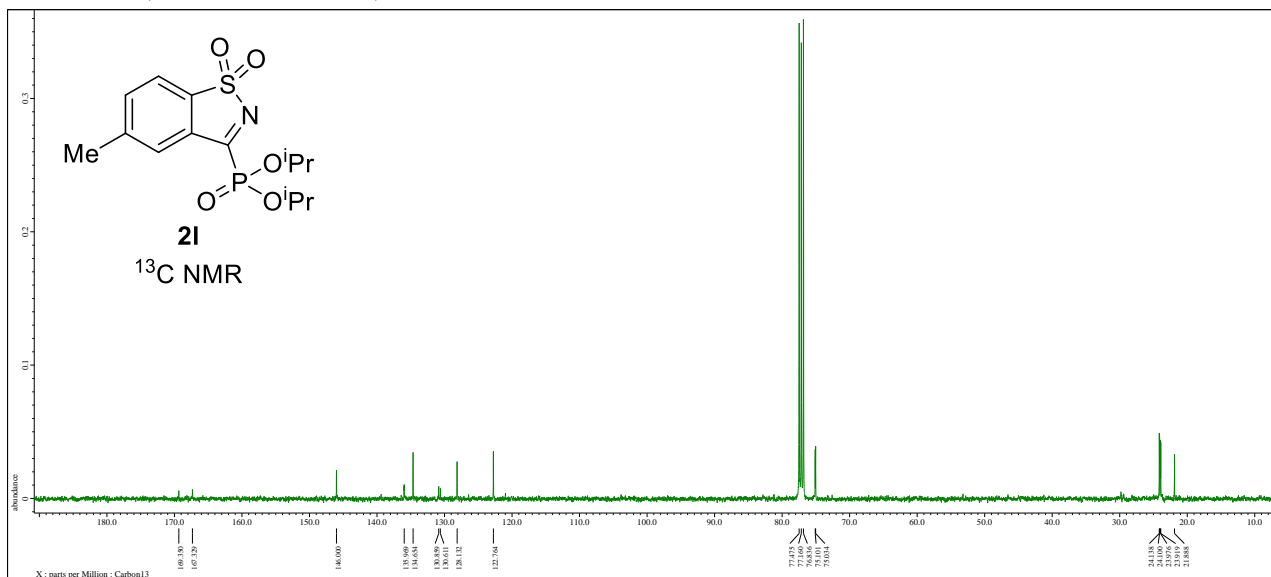

$^1\text{H-NMR}$  (400 MHz,  $\text{CDCl}_3$ ) chart of **2m**

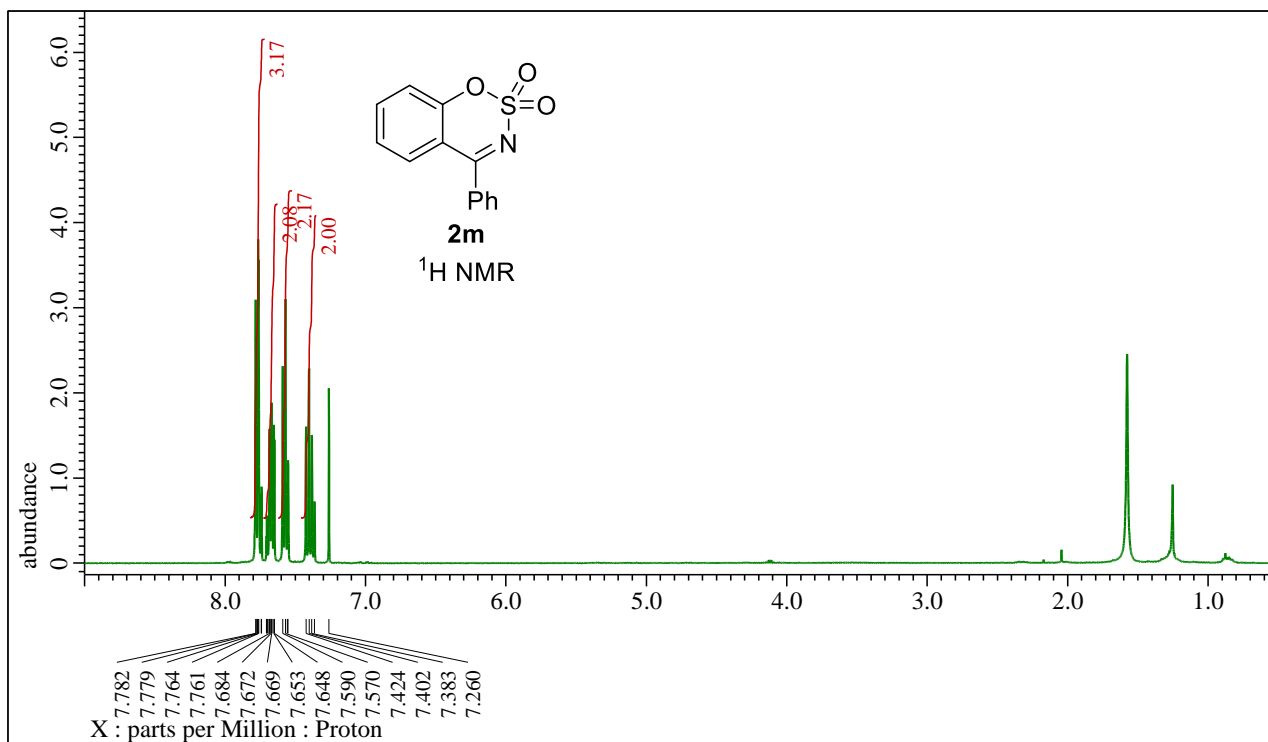

$^{13}\text{C-NMR}$  (100 MHz,  $\text{CDCl}_3$ ) chart of **2m**

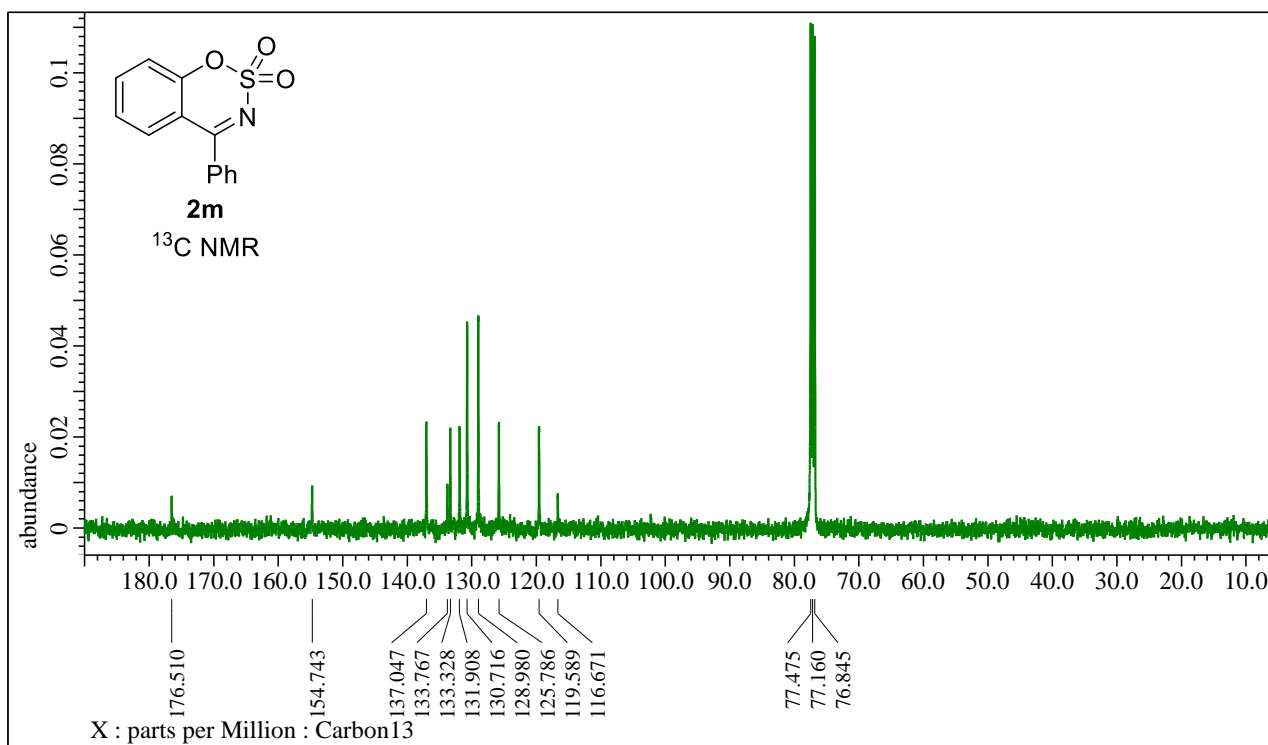

$^1\text{H-NMR}$  (400 MHz,  $\text{CDCl}_3$ ) chart of **2n**

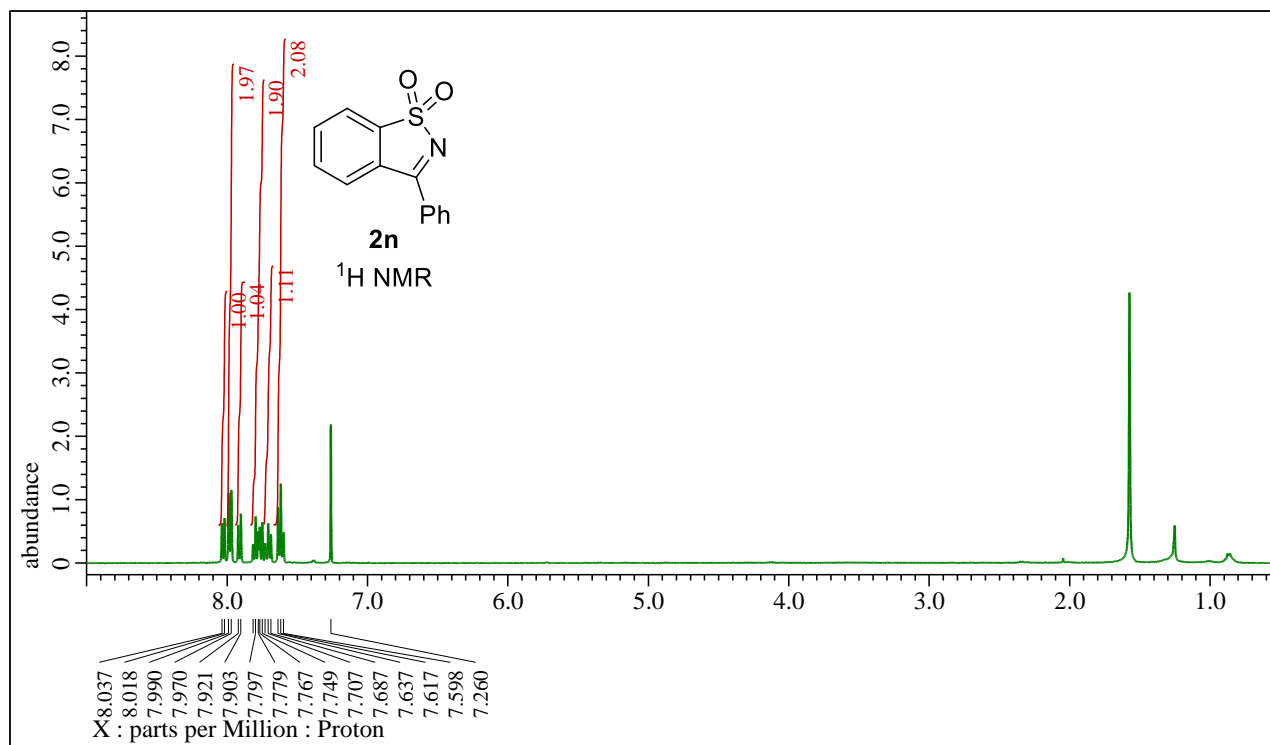

$^{13}\text{C-NMR}$  (100 MHz,  $\text{CDCl}_3$ ) chart of **2n**

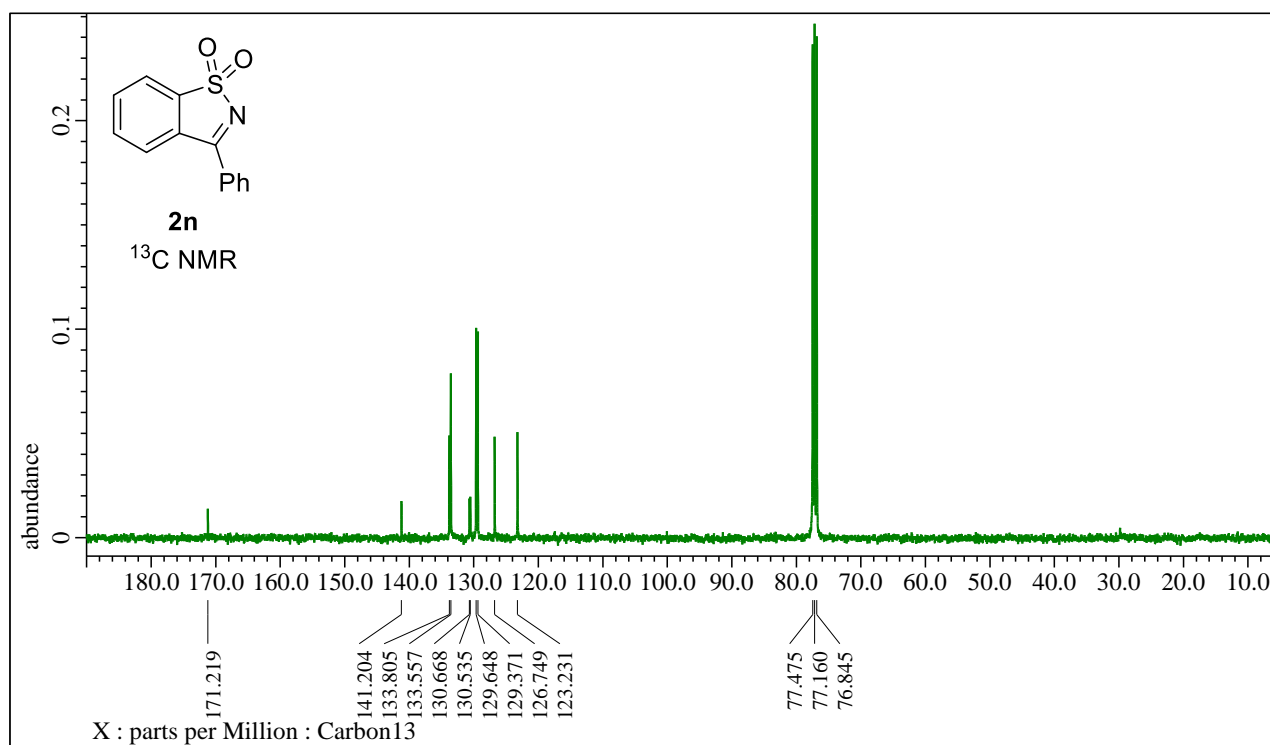

$^1\text{H-NMR}$  (400 MHz,  $\text{CDCl}_3$ ) chart of **2o**

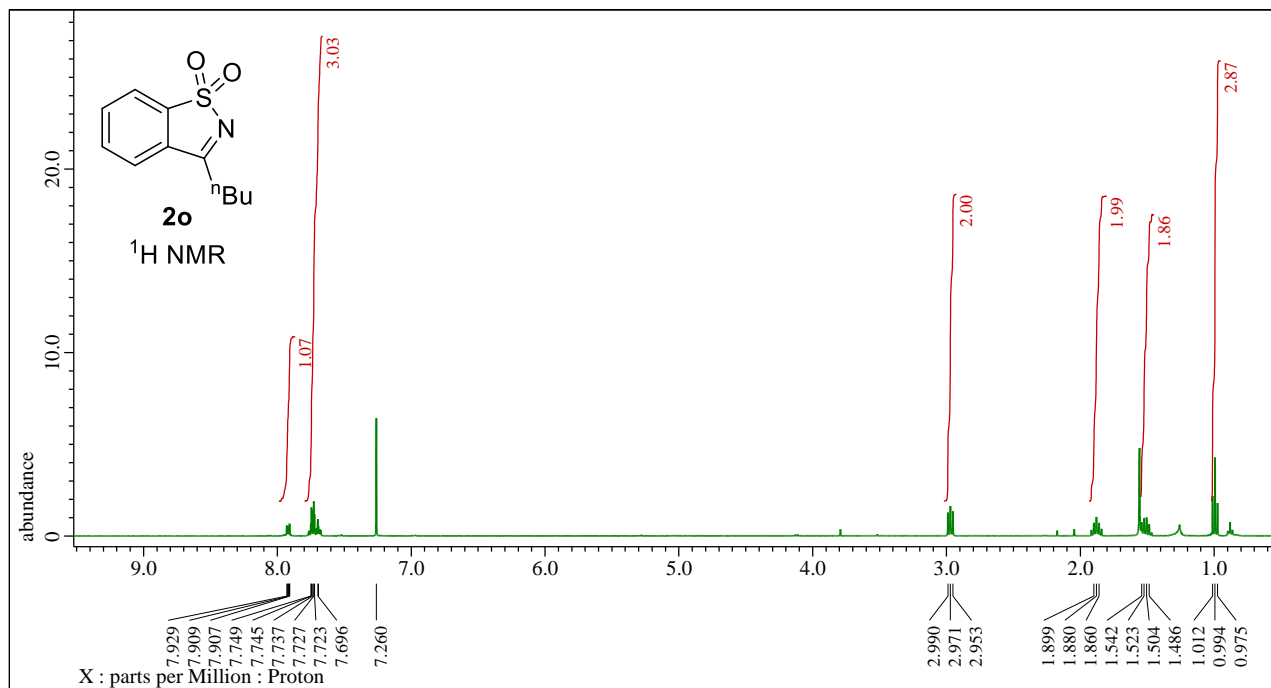

$^{13}\text{C-NMR}$  (100 MHz,  $\text{CDCl}_3$ ) chart of **2o**

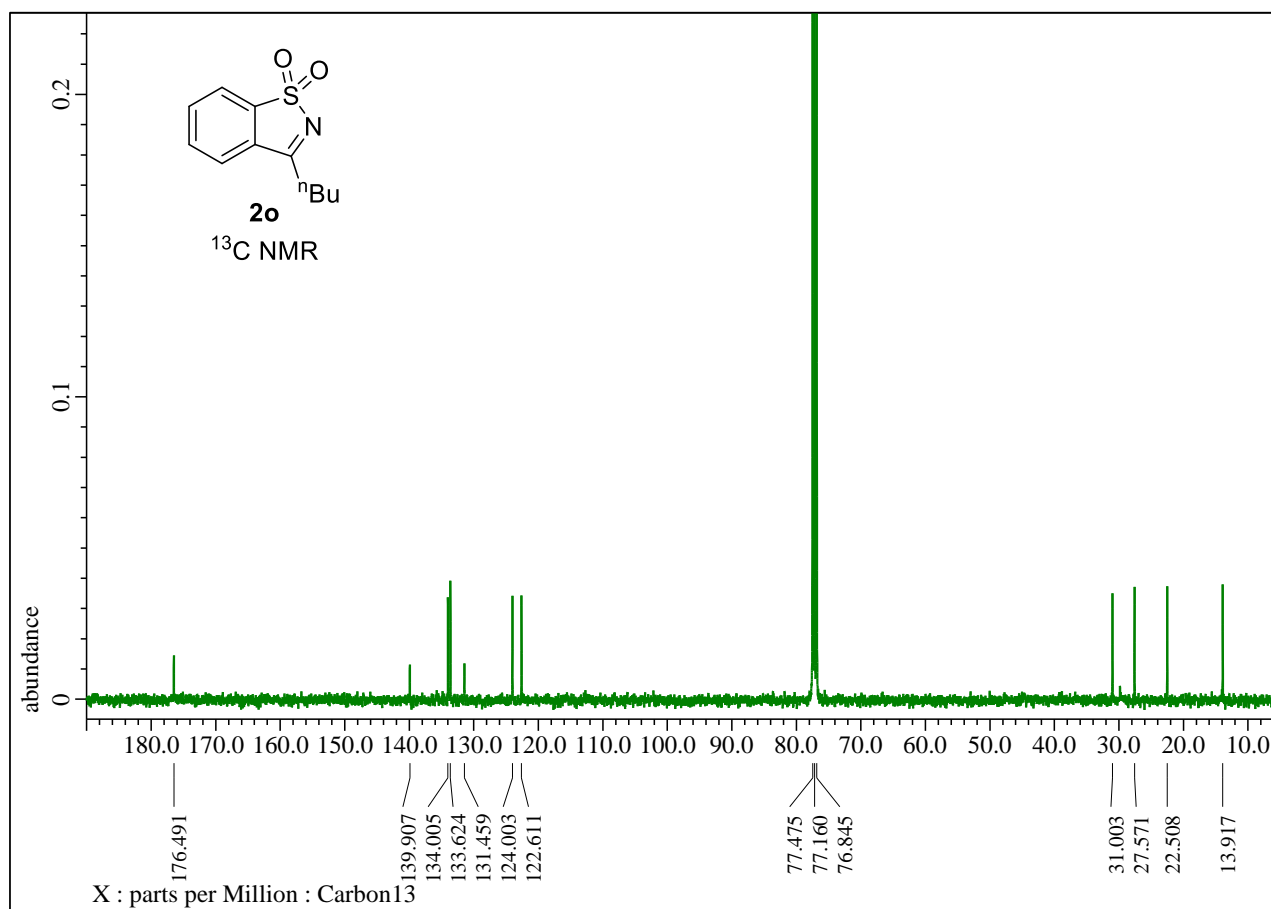



$^1\text{H-NMR}$  (400 MHz,  $\text{CDCl}_3$ ) chart of **2p**

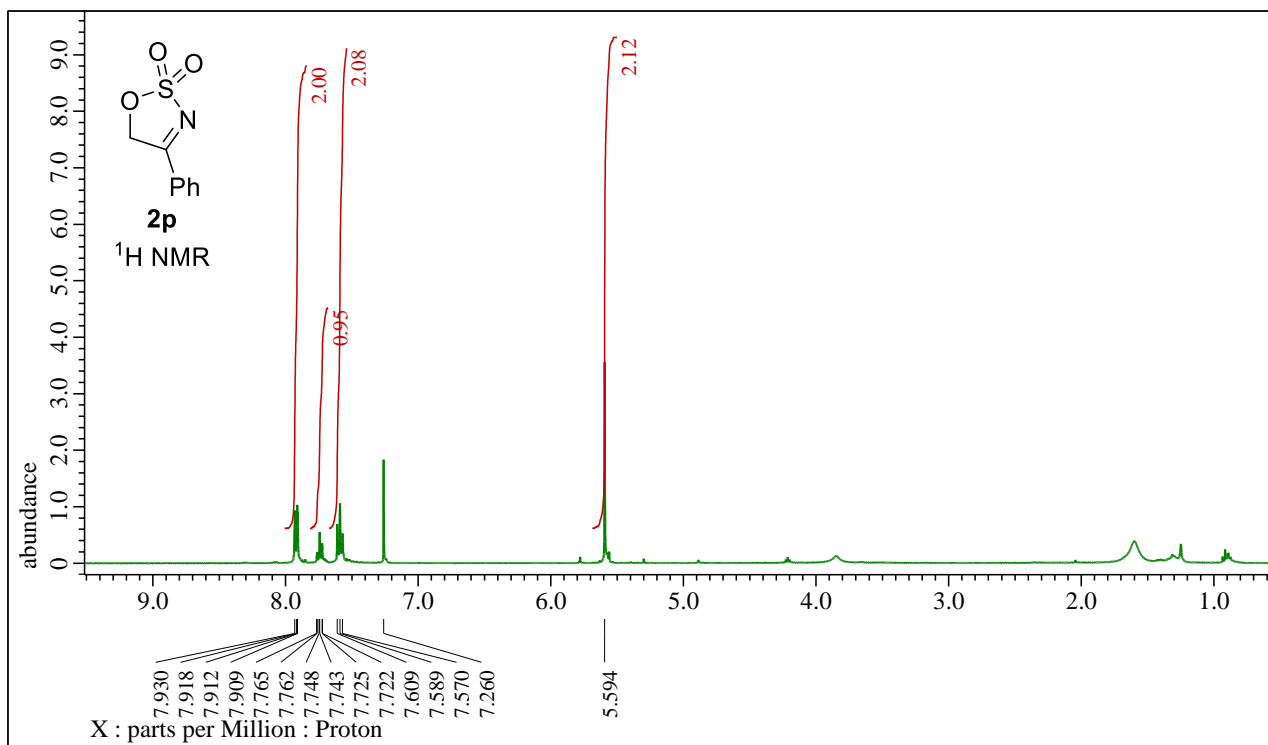

$^{13}\text{C-NMR}$  (100 MHz,  $\text{CDCl}_3$ ) chart of **2p**

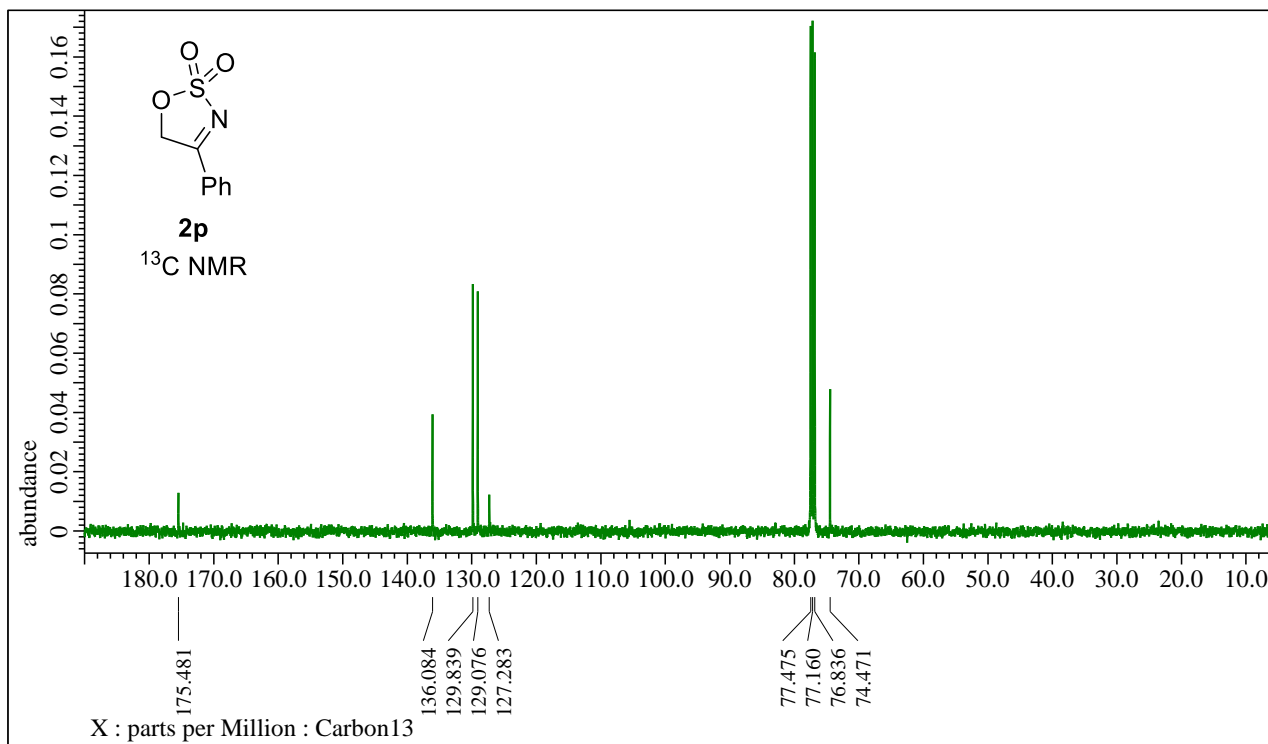

<sup>1</sup>H-NMR (400 MHz, CDCl<sub>3</sub>) chart of **3ka**

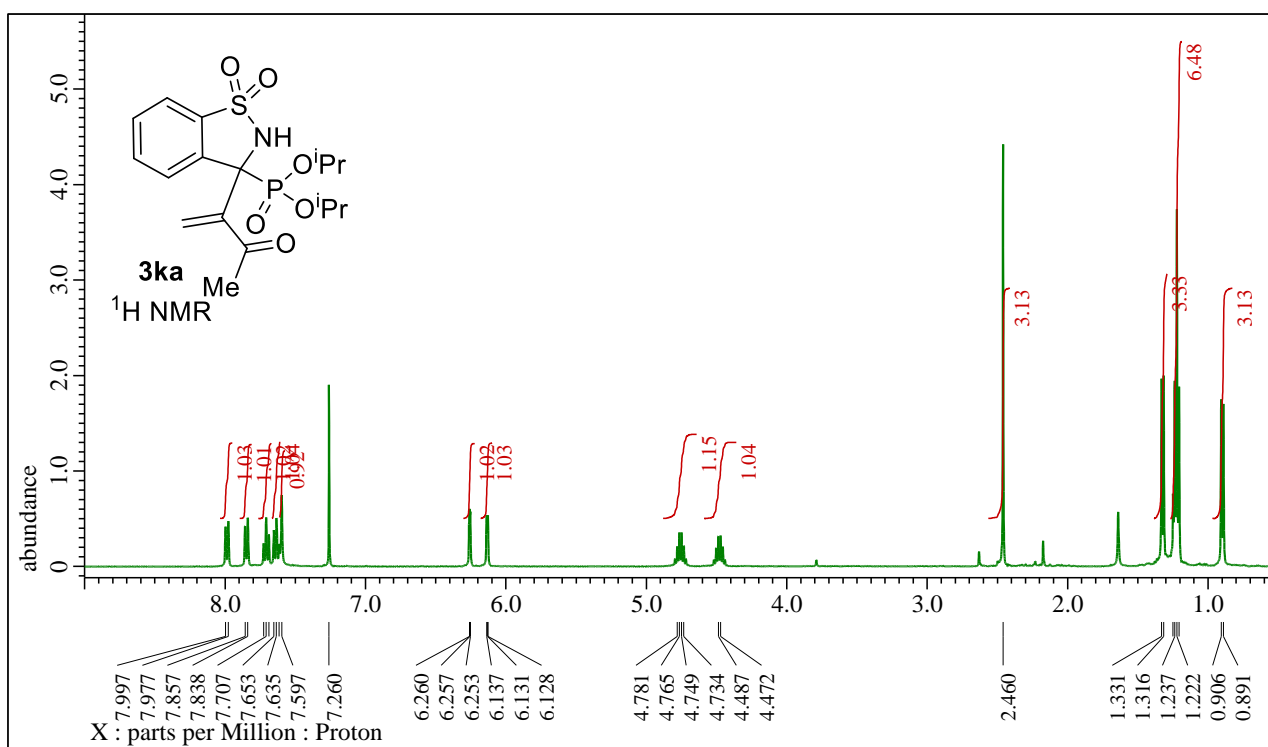

<sup>13</sup>C-NMR (150 MHz, CDCl<sub>3</sub>) chart of **3ka**

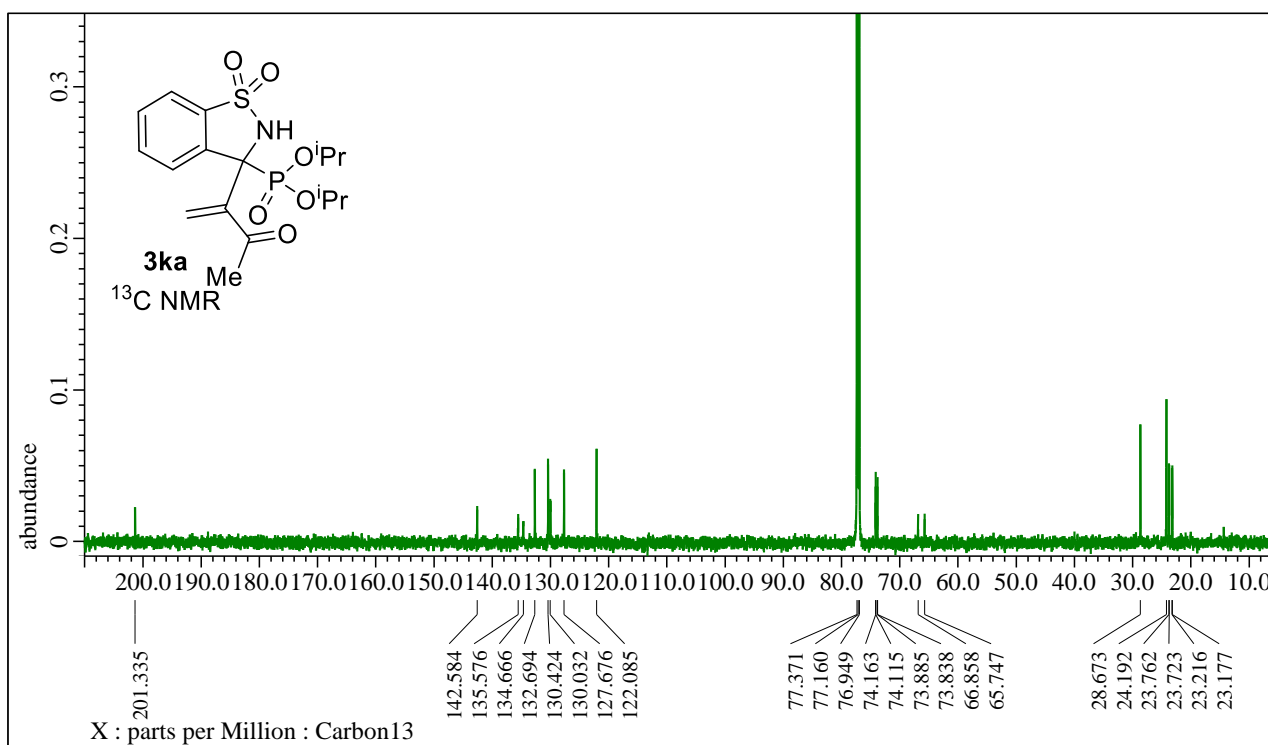

<sup>31</sup>P-NMR (240 MHz, CDCl<sub>3</sub>) chart of **3ka**

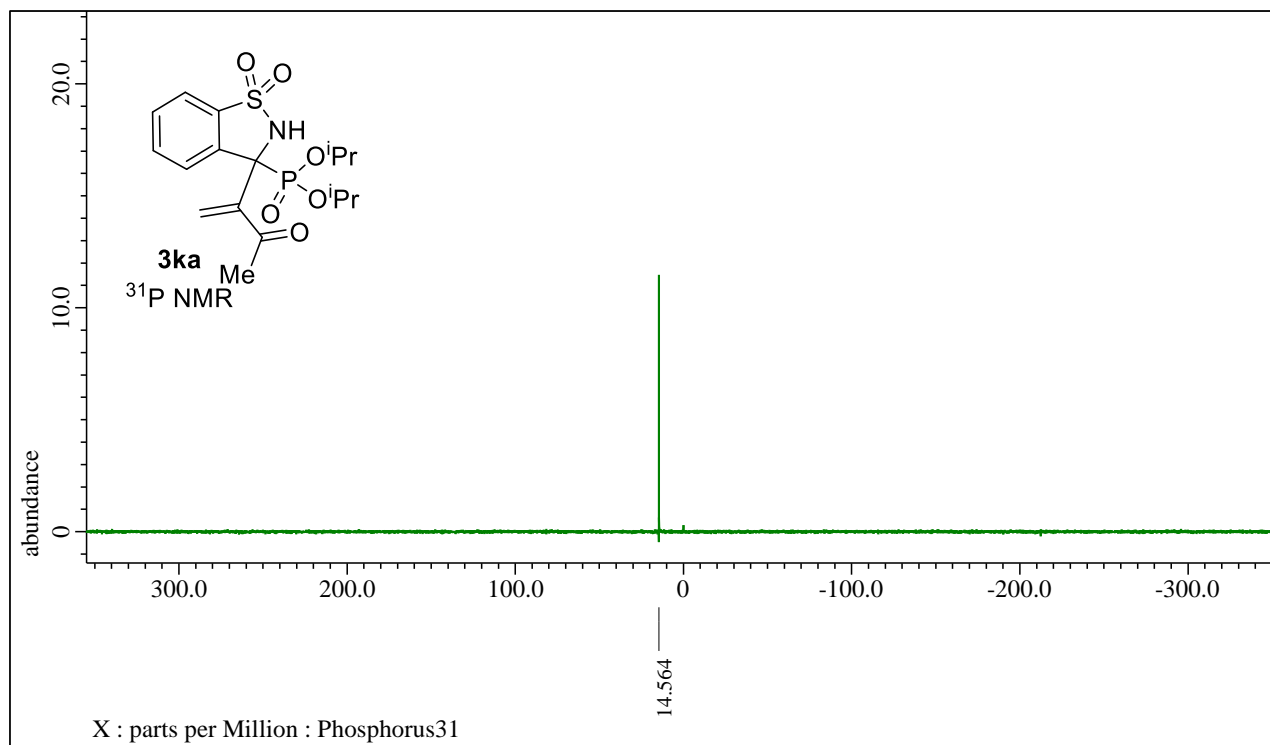

<sup>1</sup>H-NMR (400 MHz, CDCl<sub>3</sub>) chart of **3kb**

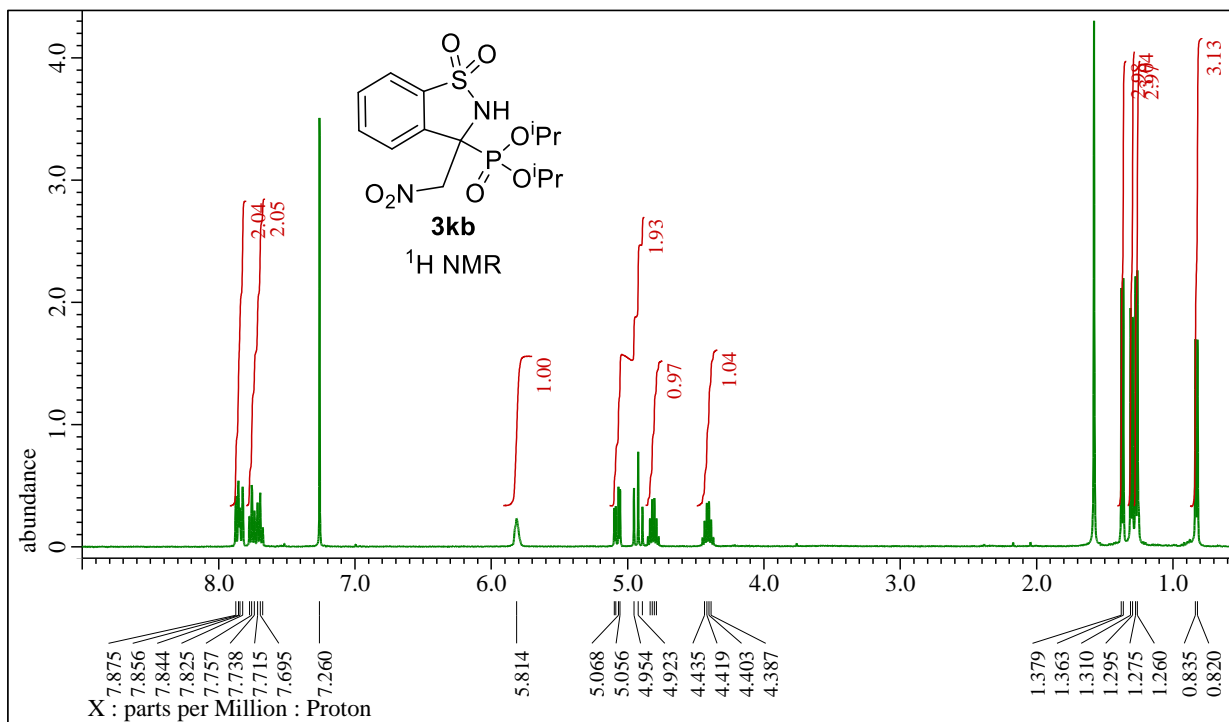

<sup>13</sup>C-NMR (100 MHz, CDCl<sub>3</sub>) chart of **3kb**

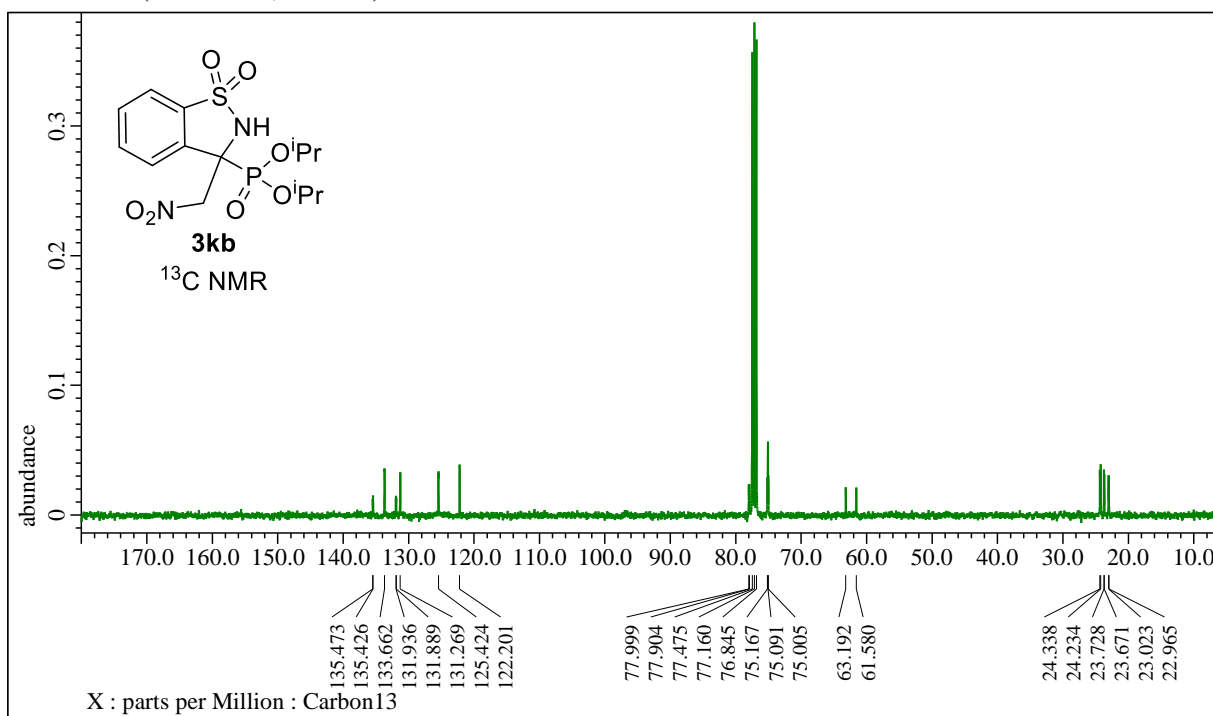

<sup>31</sup>P-NMR (240 MHz, CDCl<sub>3</sub>) chart of **3kb**

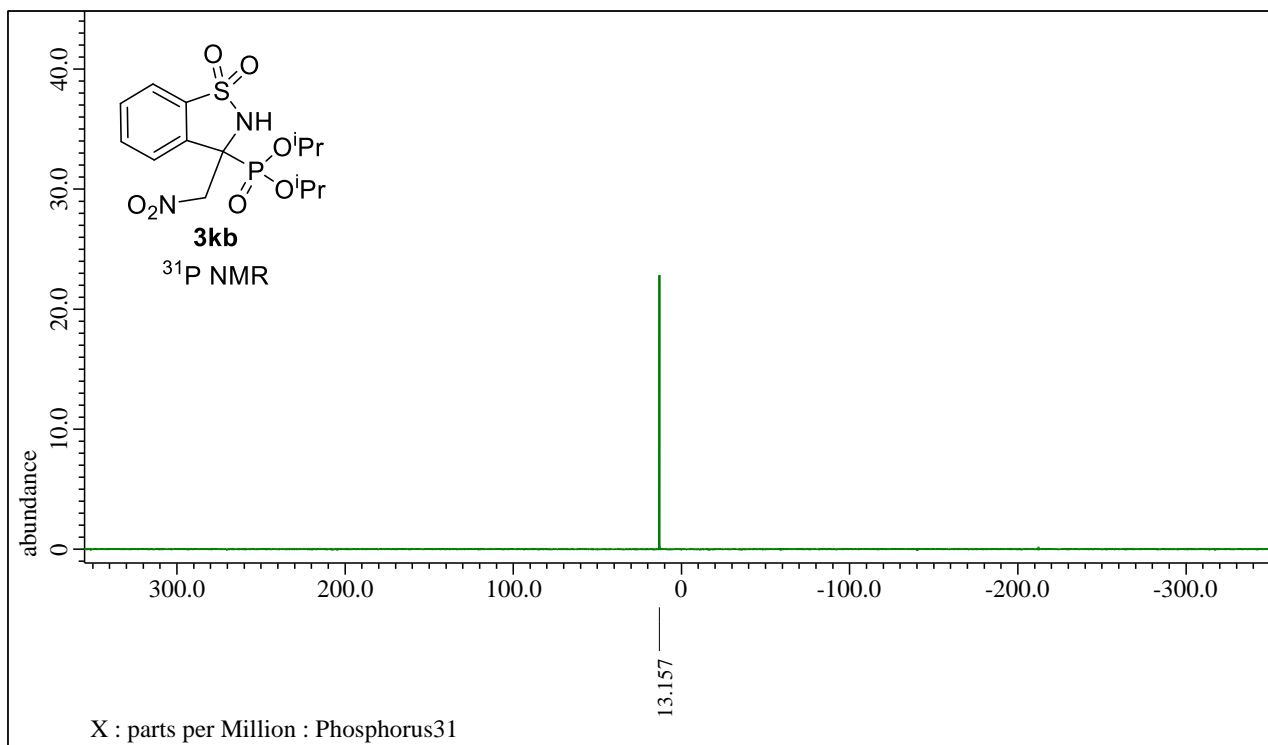

## HPLC charts

### *rac*-3ka

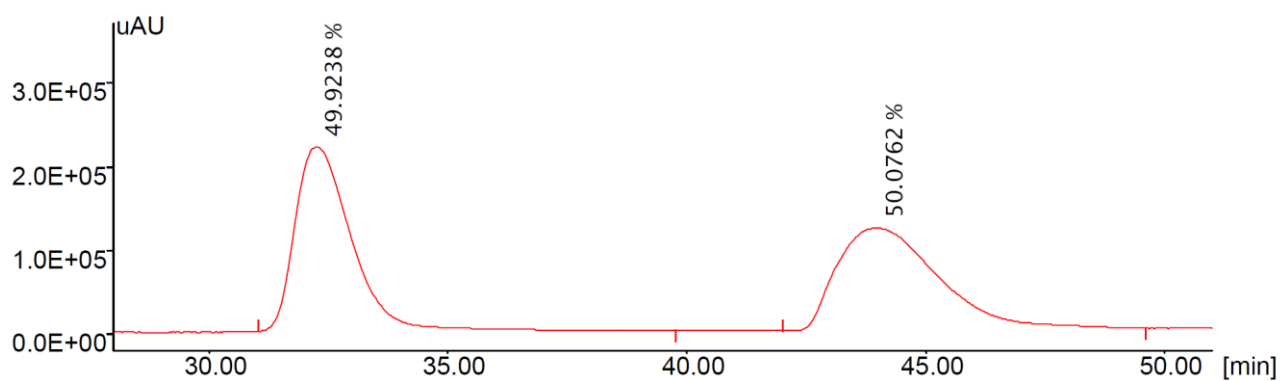

### 3ka (70% ee)

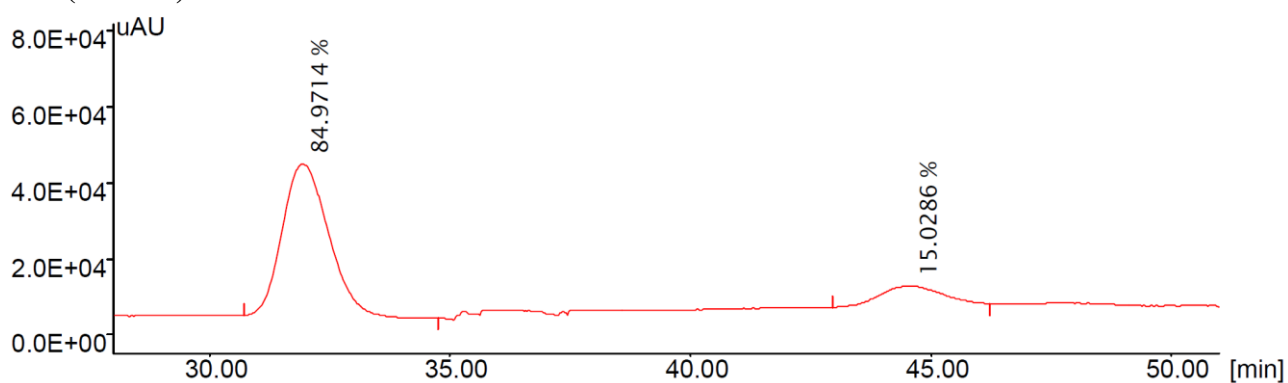

HPLC conditions: Daicel Chiralpak IE column, *n*-hexane/*i*PrOH = 50/50, 1.0 mL/min, 224 nm, tR = 31.9 min (major isomer) and 44.6 min (minor isomer).

**rac-3kb**

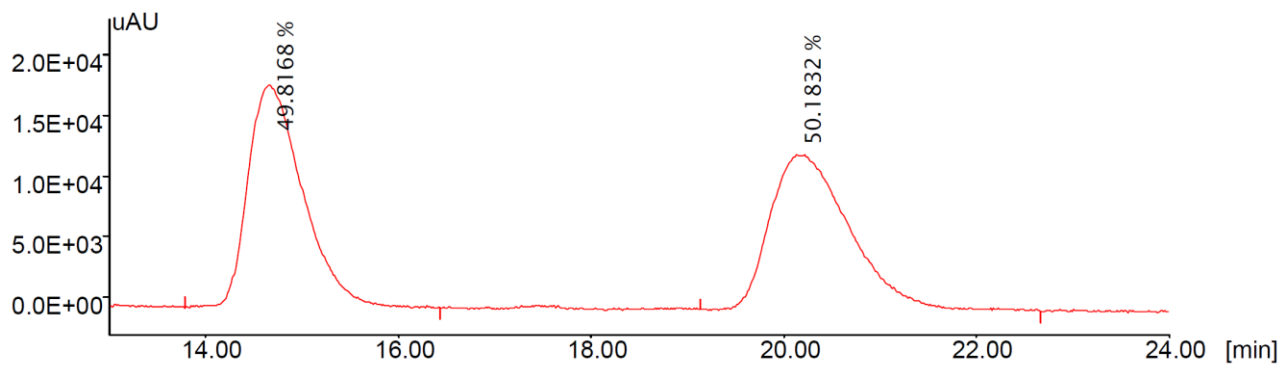

**3kb (24% ee)**

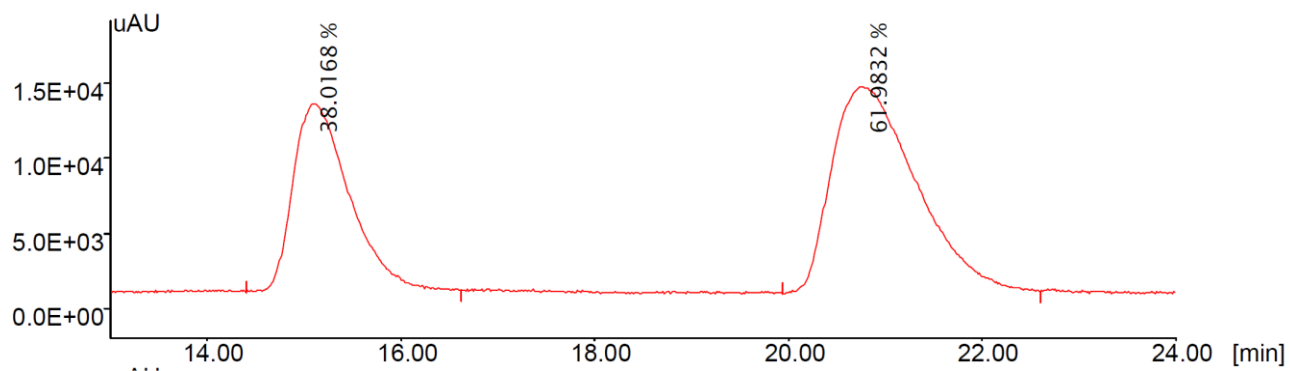

HPLC conditions: Daicel Chiralpak IE column, *n*-hexane/*i*PrOH = 50/50, 1.0 mL/min, 275 nm, tR = 14.7 min (minor isomer) and 20.8 min (major isomer).
